1 **Title: Divergent mitochondrial and nuclear OXPHOS genes are candidates for**  
2 **genetic incompatibilities in *Ficedula* Flycatchers**

3 Eva van der heijden<sup>1\*</sup>, S. Eryn McFarlane<sup>1,2,3\*^</sup>, Tom van der Valk<sup>1</sup>, Anna Qvarnström<sup>1</sup>

4 1. Animal Ecology, Ecology and Genetics, Uppsala University, Norbyvägen 18D, 752  
5 36 Uppsala, Sweden

6 2. Institute of Evolutionary Biology, University of Edinburgh, Charlotte Auerbach  
7 Road, Edinburgh, EH9 3FL

8 3. Department of Biology, Lund University, Sölvegatan 37, 223 62 Lund, Sweden

9 \*These authors contributed equally to this manuscript

10 ^author for correspondence: [eryn.mcfarlane@ed.ac.uk](mailto:eryn.mcfarlane@ed.ac.uk)

11 **Abstract**

12 Hybrid dysfunction is an important source of reproductive isolation between  
13 emerging species. Bateson-Dobzhansky-Muller incompatibilities are theoretically well-  
14 recognized as the underlying cause of low hybrid dysfunction. However, especially in  
15 wild populations, little empirical evidence exists for which genes are involved in such  
16 incompatibilities. The relative role of ecological divergence in causing the build-up of  
17 genetic incompatibilities in relation to other processes such as genomic conflict  
18 therefore remains largely unknown. Genes involved in energy metabolism are potential  
19 candidates for genetic incompatibilities, since energy metabolism depends on co-  
20 expression of mitochondrial DNA (mtDNA) and nuclear DNA (nDNA) leading to  
21 mitonuclear coadaptation. When mitochondrial and nuclear genes lacking a co-  
22 evolutionary history appear together in hybrids, incompatibilities could arise. *Ficedula*  
23 flycatcher F1 hybrids have a higher resting metabolic rate (RMR) compared to the  
24 parental species, which could be a sign of genetic incompatibilities between energy  
25 metabolism genes that diverged in response to environmental differences while the  
26 species were in allopatry. Based on sequences of 15 mitochondrial genes of 264  
27 individuals, we show that the two species have divergent mtDNA caused by the build-up  
28 of mainly synonymous mutations and a few non-synonymous mutations. Pied flycatcher  
29 mitogenomes show evidence of non-neutrality, indicating a selective sweep or  
30 population expansion. There is little variation in the nuclear OXPHOS-related proteins

31 and no significant deviation from neutrality, however, specific codon identified sites  
32 might be under positive selection in both mitochondrial and nuclear genes encoding  
33 OXPHOS proteins for complex I and III. Taken together, these diverged mitonuclear  
34 genes therefore constitute possible candidates underlying, at least part of the genetic  
35 incompatibilities that cause hybrid dysfunction in crosses between collared and pied  
36 flycatchers.

## 37 **Introduction**

38 Sterility or inviability is often observed in the F1 hybrids of genetically diverged  
39 populations. Bateson (1909), Dobzhansky (1936) and Muller (1940; 1942) outlined  
40 theoretical models explaining the evolution of such genetic incompatibilities in hybrids.  
41 They proposed a two-loci system with interacting genes where alternative new  
42 mutations can go to fixation in geographically separated populations without causing  
43 incompatibilities within any one of the populations (i.e. Bateson-Dobzhansky-Muller  
44 incompatibilities (BDMI)). However, when the two populations come into secondary  
45 contact and interbreed, these alternative alleles can cause hybrid dysfunction as a result  
46 of epistasis. Empirical evidence for BDMI has been found in model species such as  
47 *Mimulus* (Fishman & Willis 2001) and *Drosophila* (Brideau et al 2006), but general  
48 processes that lead to BDMIs are not well described in wild systems. To what extent  
49 ecological divergence, rather than other processes such as genomic conflict, is causing  
50 the build-up of genetic incompatibilities therefore remains largely unknown.

51 One set of genes that are potentially interesting candidates for BDMI are those  
52 directly involved in energy metabolism (Burton & Barreto 2012, Gershoni et al 2009).  
53 The fitness of an organism depends upon efficient energy metabolism under the  
54 environmental conditions experienced (e.g. (Bozinovic et al 2011, Mishmar et al 2003)).  
55 Thus local adaptations to climate can cause rapid divergence between populations  
56 (Qvarnström et al 2016). Energy production is regulated by the mitochondria via the  
57 oxidative phosphorylation pathway (OXPHOS). Mitochondrial DNA (mtDNA) codes in  
58 most organisms for 13 proteins and several non-coding RNAs (transfer RNA, ribosomal  
59 RNA). OXPHOS is built up of protein complexes composed of both mitochondrial and  
60 nuclear encoded proteins and thus mtDNA and nuclear (nDNA) products strongly  
61 interact in this pathway (Smeitink et al 2004). This results in selection for coadaptation  
62 between these two genetic systems (Gershoni et al 2009, Willett & Burton 2001). MtDNA  
63 mutates quickly (Brown et al 1979) and usually does not recombine, which, in  
64 combination with a small effective population size, may lead to fixation of slightly  
65 deleterious mutations. Coevolution can then lead to compensatory changes in the  
66 interacting nDNA (Rand et al 2004). If energy metabolism in two populations has  
67 adapted to different climates (e.g. changes in mtDNA and the interacting nDNA),

68 hybridisation can result in incompatibilities between the OXPHOS proteins in the F1  
69 offspring i.e. BDMIs.

70 Natural hybrid zones provide good opportunities to study the possible effect of  
71 divergent energy metabolism on postzygotic isolation. *Ficedula hypoleuca* and *Ficedula*  
72 *albicollis* (pied and collared flycatchers, respectively) are two species of small migratory  
73 birds that diverged less than one million years ago (Nadachowska-Brzyska et al 2013)  
74 and are frequently used as models for research on ecology and evolution (Qvarnström et  
75 al 2010). Pied flycatchers are present mostly in the north of Europe, whereas collared  
76 flycatchers have a more southern breeding distribution (Figure 1). In the 1960's,  
77 collared flycatchers colonized the Swedish island Öland that was already inhabited by  
78 pied flycatchers (Qvarnström et al 2010), thus leading to secondary contact between the  
79 two species. Divergent climate adaptation seems to play an important role in mitigating  
80 the effects of competitive interactions between the two species of flycatchers  
81 (Qvarnström et al 2016). Collared flycatchers displace pied flycatchers from the  
82 preferred breeding sites (Vallin et al 2012), but appear to be constrained to a narrower  
83 niche use, whereas pied flycatchers are less affected by a mismatch between food  
84 abundance and nestling growth (Qvarnström et al 2009, Sirkiä et al 2018). This  
85 robustness might be explained by higher plasticity in metabolic rate of pied flycatchers,  
86 as pied flycatcher nestlings have a lower resting metabolic rate (RMR) at higher  
87 temperatures (associated with low food availability) and increased RMR in response to  
88 relaxed sibling competition when compared to collared flycatchers (McFarlane et al  
89 2018). The flexible RMR response to environmental conditions observed in pied  
90 flycatchers may allow pied flycatchers to breed in low quality habitat and late in the  
91 season when food availability is lower (McFarlane et al 2018).

92 Despite competition between the two species over similar nesting sites, they also  
93 interbreed at a low frequency, resulting in hybrids with an intermediate plumage  
94 phenotype (Figure 1). Hybrids display extremely low fertility as female hybrids lay  
95 empty eggs (Svedin et al 2008) and male hybrids have malformed sperm (Ålund et al  
96 2013). Additionally, flycatcher hybrids have a higher RMR compared to both parental  
97 species (McFarlane et al 2016), suggesting increased energy requirements for  
98 maintenance and thus likely impacting fitness (i.e. less available energy for other traits).  
99 This might indicate genetic incompatibilities in the mitonuclear pathway, however, it

100 remains unknown to what extent the two species have diverged in their mtDNA and  
101 corresponding nuclear OXPHOS genes.

102 In this study we aimed to investigate if genetic divergence of the mtDNA and  
103 associated nuclear OXPHOS genes between collared and pied flycatchers could play a  
104 role in hybrid dysfunction. We examined patterns of neutrality and selection on both  
105 types of DNA, to narrow in on regions that may be associated with differences in  
106 plasticity of RMR and/or be causing BDMIs between the two species.

107

## 108 **Materials and methods**

### 109 *Population monitoring*

110 The flycatcher population on Öland has been continuously studied since 2002  
111 (see (Qvarnström et al 2009) for a thorough description of our field methods). Briefly,  
112 more than 2000 nestboxes are monitored for breeding activity in May and June. All birds  
113 (male and female adults, and nestlings) are individually ring marked and blood samples  
114 are taken for genetic analyses. mtDNA was sequenced from 227 individuals.  
115 Additionally, whole genome DNA data has previously been generated for 38 individuals  
116 (Burri et al 2015).

117

### 118 *Bioinformatics*

119 We sequenced the 12S, 16S, ATP, CO1, CO3, CytB, ND1, ND2, ND3, ND4L, ND4 and ND6  
120 regions of the mtDNA of 227 flycatchers (165 collared flycatchers, 45 pied flycatchers,  
121 17 hybrids) with paired Sanger sequencing using the primers from (Amer et al 2013).

122 All sequences were trimmed with DNA Baser v4.36.0 (BioSoft 2013), on default  
123 settings for samples with 'normal' quality (trim until >60% good bases (QV>20) in 16  
124 base window). Paired reads were assembled into contigs using the DNA Baser default  
125 settings and visually inspected for ambiguities in the forward versus the reverse strand.  
126 We obtained good quality sequences for different individuals per gene, resulting in  
127 different numbers of sequences per gene alignment.

128 For the nuclear analysis we used genomic sequences of 19 pied and 19 collared  
129 flycatchers from Öland (available on EMBL-EBI European Nucleotide Archive (accession  
130 PRJEB7359);(Burri et al 2015)). Exons of the OXPHOS-related genes were extracted  
131 from the genomic data aligned to the collared flycatcher reference (FicAlb 1.5) using the  
132 annotated genome (we extracted both nuclear and mitochondrial genes and merged the  
133 data for the mitochondrial genes with the new sequence data). Pseudo-haploid  
134 consensus sequences of the genes were made by calling all positions covered by at least  
135 two reads and randomly choosing an allele for heterozygous sites using ANGSD –dofasta  
136 (Korneliussen et al 2014). An overview of all the included genes (nuclear and  
137 mitochondrial) can be found in Supplementary Table S1. We included all mitochondrial  
138 genes and most nuclear OXPHOS-related genes that are a part of OXPHOS complexes I,  
139 III, IV and V (complex II is not included, since this complex only contains nuclear-  
140 encoded genes and thus has no direct interactions with mitochondrial genes). One pied  
141 individual was excluded from our analysis as it clustered with collared flycatchers based  
142 on the mtDNA, suggesting potential contamination or mislabelling.

143 All individual contigs were aligned with AliView using MUSCLE (default settings)  
144 (Larsson 2014). The collared flycatcher mitochondrial genome (Ekblom et al  
145 2014);NCBI) and nuclear gene sequences from NCBI were used as reference sequences.  
146 For mtDNA, all insertions, deletions and polymorphisms in the sequences were visually  
147 inspected with DNA Baser to ensure no base calling mistakes.

148

### 149 *Haplotype Networks*

150 To visualise inter- and intraspecific genetic variation we made two haplotype  
151 networks, one based on mtDNA and one based on nDNA. SequenceMatrix 1.8 (Vaidya et  
152 al 2011) was used to concatenate the genes per individual and PopART (Bandelt et al  
153 1999, Leigh & Bryant 2015) was used to make a median-joining haplotype network of  
154 the concatenated sequences. PopART only includes sites called in >95% of individuals,  
155 so we based the mtDNA network on a concatenation of the regions for which sequences  
156 were available for most individuals (12S, ATP, ND1, ND2, ND3 and ND4) (Bandelt et al  
157 1999, Leigh & Bryant 2015). In addition, we removed individuals that had few called  
158 bases from the analysis; the resulting haplotype network consists of 147 collared, 12

159 hybrid and 29 pied flycatchers. For nDNA enough sequence data was available to include  
160 all genes and individuals.

161

### 162 *Estimates of diversity and divergence*

163 We calculated haplotype diversity ( $H_d$ ) and nucleotide diversity ( $\pi$ ) as measures  
164 of genetic diversity within each species, separately for mtDNA and nuclear OXPHOS-  
165 related genes. In addition, divergence between the two species was analysed by  
166 calculating the average number of nucleotide substitutions per site between populations  
167 with a Jukes-Cantor adjustment ( $D_{XY}$ ) and the average number of nucleotide differences  
168 between the populations ( $k$ ). All analyses were done with DnaSP (version 6.12) (Rozas  
169 et al 2017), on concatenated alignments of the genes.

170 mtDNA summary statistics were calculated for a concatenated alignment of the  
171 regions for which we obtained the most sequence data (12S, 16S, ATP, CO1, CO3, CytB,  
172 ND1, ND2, ND3, ND4). In order to avoid biased results due to different sample sizes we  
173 used the 23 pied and 23 collared individuals for which the most complete sequence  
174 dataset was available.

175 We identified and classified polymorphic sites in our alignments. A site was  
176 considered as a polymorphic site when the polymorphism was shared by either at least  
177 five individuals (when the alignment contained both newly sequenced mtDNA data and  
178 data extracted from (Burri et al 2015) ( $\pm 264$  individuals), or shared by at least three  
179 individuals (when an alignment only contained data extracted from (Burri et al 2015)  
180 ( $\pm 37$  individuals). Per site, we classified the polymorphism as a fixed difference, as  
181 variable in either species or as variable in both species, and we determined whether the  
182 site is non-coding, non-synonymous or synonymous.

183 Since variation in nDNA consisted for a large part of shared polymorphisms (see  
184 Results), we tested whether there was a significant difference in allele frequency for  
185 shared SNPs between the two species. Shared mitochondrial SNPs were compared  
186 between haplogroups, with mtDNA sequences for the hybrids added to the data of the  
187 corresponding maternal species (haplogroups are based on haplotype network and  
188 known species information (see Results)). We applied a chi-squared test (Ryman et al  
189 2006) and Fisher's exact test, which is intended for small sample sizes (Cammen et al

190 2015, Ryman & Jorde 2001). We used a Bonferroni correction to adjust for multiple  
191 testing. We report Fisher's exact test below, and the chi-squared test in Supplementary  
192 Table S2. This analysis was done in R ((R Core Team 2017); scripts available in  
193 supplementary material).

194

#### 195 *Analyses of non-neutrality and selection*

196 Fu and Li's F and D test statistic (FLF\*, FLD\*)(Fu & Li 1993) and Tajima's D  
197 (Tajima 1989) were calculated with DnaSP to test departures from neutrality in all  
198 genes of interest. A negative neutrality test can be a sign of purifying selection, selective  
199 sweep or population expansion, whereas a positive neutrality test can be a sign of  
200 balancing selection or a bottleneck.

201 We used a variety of methods to identify positive selection on our genes of  
202 interest. To identify codon specific positive selection, based on the ratio of non-  
203 synonymous versus synonymous substitutions per site ( $\omega$ ; dN/dS), we used CodeML  
204 (from the package PAML) (Yang 2007) which uses a Bayesian Empirical Bayes-method  
205 (BEB) to identify positively selected sites. Next, we employed a likelihood ratio test to  
206 compare a model with a single  $\omega$  (model 0) to models with variable  $\omega$  (either nearly  
207 neutral or discrete). Subsequently, likelihood-values obtained for models including  
208 positive selection were compared to the values for models without positive selection  
209 (positive selection vs nearly neutral and beta and omega vs beta). Additionally, we used  
210 the 'mixed effects model of evolution' (MEME) (Murrell et al 2012) and 'fast  
211 unconstrained Bayesian approximation' (FUBAR) (Murrell et al 2013) from HYPHY  
212 (datamonkey.org; (Kosakovsky Pond et al 2005, Weaver et al 2018). MEME uses  
213 maximum likelihood estimation to identify episodic selection on individual sites  
214 (Murrell et al 2012). FUBAR uses a Bayesian approach to infer non-synonymous and  
215 synonymous substitution rates per site (Murrell et al 2013).

216

## 217 **Results**

### 218 *Haplotype network*



219 We confirmed that the two species have diverged on both the mt- and nDNA as  
220 they cluster separately in the haplotype-networks (Figures 2, 3). Based on the mtDNA  
221 network, we separated the two species into haplogroups using the pied and collared  
222 clusters, and assigned a maternal species to all hybrids. Six hybrids clustered with pied  
223 flycatchers, suggesting pied flycatcher maternity, and six hybrids clustered with collared  
224 flycatchers, suggesting collared flycatcher maternity (Figure 2). Additionally, three  
225 ‘collared hybrids’ and two ‘pied hybrids’ did not have enough sequences available for the  
226 haplotype network analysis, so are not included. Within both clusters, most haplotypes  
227 differed from each other by a few mutations, as indicated by the perpendicular bars on  
228 the edges. The collared flycatcher cluster had 17 haplotypes that were shared between  
229 several individuals, whereas in the pied flycatcher cluster most individuals had unique  
230 haplotypes (only 3 haplotypes are shared). The collared NCBI reference sequence was a  
231 part of the circle CF-10 which is the most common haplotype among collared  
232 flycatchers.

233 Similarly, pied and collared flycatchers cluster separately based on the nuclear  
234 haplotypes of OXPHOS-related genes (figure 3). Unsurprisingly, each individual had a  
235 unique haplotype, separated by several mutations from all other individuals.

236

### 237 *Genetic diversity and divergence*

238 Mt- and nDNA showed slightly different patterns of genetic diversity and  
239 divergence. We found higher genetic and haplotype diversity in pied flycatcher mtDNA  
240 ( $Hd = 1$ ,  $\pi_{pied} = 0.00162$ ) versus collared flycatcher mtDNA ( $Hd = 0.976$ ,  $\pi_{collared} =$   
241  $0.00148$ ), whereas nDNA was more diverse in collared flycatchers ( $\pi_{pied} = 0.00269$ ,  $SD$   
242  $= 0.00008$ ;  $\pi_{collared} = 0.00280$ ,  $SD = 0.00008$  (NS)) (Table 1). As expected nDNA is  
243 generally less diverged compared to mtDNA. Mitochondrial divergence between the two  
244 species measured as the absolute divergence ( $D_{XY}$ ) and average number of nucleotide  
245 differences between the two populations ( $k$ ) (Table 1) was 0.03302 ( $SD = 0.00244$ ) and  
246 175.745 respectively. Divergence between the nDNA of the two species was 0.00422  
247 ( $D_{XY}$ ,  $SD = 0.00031$ ) (Table 1).

248

249

250

251 *Polymorphic sites*

252 We find clear differences between the polymorphic sites in the nDNA and the  
253 mtDNA. There are fewer polymorphic sites in the nuclear OXPHOS-related genes (N =  
254 118) compared to the mtDNA (N = 454) and more fixed differences between the species  
255 in the mtDNA (N = 188) compared to the nDNA (N = 2).

256 In the mtDNA, we identified 454 variable sites (out of 11,413 sites). 188 of those  
257 were fixed differences, as well as 28 shared polymorphisms and 238 polymorphisms  
258 that were monomorphic in one species but polymorphic in the other (Table S1). The  
259 majority of variable sites were in the third codon position of the nucleotide sequence  
260 and were synonymous (392/454), but we identified 62 non-synonymous  
261 polymorphisms. 13 of the non-synonymous SNPs were fixed between the two species (in  
262 ND1, ND2, ND4L, ND5, CO2 and ATP6), and a large proportion of non-synonymous  
263 polymorphisms were shared between the two species (12/28). 17 polymorphic non-  
264 synonymous mutations were polymorphic in the pied but monomorphic in the collared  
265 flycatchers, and 20 non-synonymous mutations were polymorphic in the collared but  
266 monomorphic in the pied flycatchers (Table S1).

267 In the coding regions of the nDNA we identified 118 variable sites (out of 20,868  
268 sites). Many of the analysed genes did not have any variation in the coding region (Table  
269 S1). There were only two fixed differences between the two species in the coding  
270 regions of the analysed genes (both in COX7C) and five in the non-coding parts  
271 surrounding genes that were included in the alignments (ATP5F1B, ATP5MG) (Table  
272 S1). Generally, polymorphisms were shared between species (151, 46 in coding regions)  
273 although 147 (47 in coding regions) were polymorphic only in collared flycatchers and  
274 109 (22 in coding regions) were polymorphic only in pied flycatchers. When the  
275 OXPHOS complexes were compared, eight non-synonymous mutations were present in  
276 complex I, five in complex III, no non-synonymous mutations in complex IV and one in  
277 complex V. Most non-synonymous mutations were found in collared flycatchers, with  
278 the exception of the mutation in complex V and one mutation in complex III that were  
279 only polymorphic in pied flycatchers, while five non-synonymous polymorphisms were  
280 shared between the two species.

281           Since many SNPs in the nDNA were shared between the two haplogroups, we  
282           calculated allele frequency differences to test for species divergence. All 179 shared  
283           SNPs (151 nDNA, 28 mtDNA) were analysed with a Fisher's exact test and a chi-squared  
284           test (Figure 4 and Table S2). 25 SNPs were significantly different between the species,  
285           of which 15 were mtDNA and 10 nDNA. Most significant SNPs were a part of complex I  
286           (14), followed by complex IV (6), III (3) and V (2). Chi-squared tests gave very similar  
287           results, although one site in nDNA complex I was no longer significantly different (Table  
288           S2). This result indicates that even though there are fewer shared polymorphic sites in  
289           mtDNA, those sites are more often significantly different between the species.

290

### 291 *Neutrality and positive selection*

292           We found deviations from neutrality in the OXPHOS genes in the mtDNA of  
293           pied and collared flycatchers, but not in the nDNA of either species, possibly due to low  
294           power because there was little to no variation in the coding regions of the nDNA (Li's D  
295           and F Statistics, Table 2). Specifically, in the mtDNA, we found evidence of selection on  
296           12S, 16S, CytB, ATP6 (both species) and ND2, ND4, ND6, CO1, CO2 and CO3 (only piers),  
297           possibly indicating a selective sweep. Alternatively, a recent population expansion might  
298           be the cause of the observed deviations from neutrality (Table 2). There was no  
299           significant pattern of selection on the other genes and the pattern was consistent  
300           between Fu and Li's D and Tajima's D for almost all genes (Table 2).

301           When we analysed the mtDNA genes as a concatenated alignment, FLD\*, FLF\* and  
302           Tajima's D were significantly negative for the pied population, but not different from  
303           zero in the collared population (Table 2). For the concatenated nDNA OXPHOS regions,  
304           the neutrality tests for the collared flycatchers were more negative compared to the pied  
305           flycatchers (collared: FLF\* = -0.3591, FLD\* = -0.4120, Tajima's D = -0.3404; pied: FLF\* =  
306           -0.2638, FLD\* = -0.2290, Tajima's D = -0.0391), although none of the tests is significantly  
307           negative.

308           In addition to examining neutrality in each gene, we also identified positive  
309           selection on specific codons in both mtDNA and nDNA for complexes I and III. In the  
310           mitochondrial genes, we found signals of positive selection on 14 sites in ND1, ND4,  
311           CytB, CO1 and CO3 (Table 3). These genes are part of complexes I, III and IV. Further, we

312 found positive selection between the species on 12 sites in the nuclear genes NDUFA5,  
313 NDUFB3, NDUFS1, NDUFS7, NDUFV1, UQCRC2 and ATP5PF. These genes are a part of  
314 the complexes I, III and V.

315

## 316 **Discussion**

317 Collared and pied flycatchers diverged less than 1 million years ago  
318 (Nadachowska-Brzyska et al 2013) with strong postzygotic reproductive isolation in the  
319 form of hybrid dysfunction and infertility (Ålund et al 2013, McFarlane et al 2016,  
320 Svedin et al 2008). Here, we specifically focus on divergence in mtDNA and the  
321 interacting nuclear OXPHOS genes, as we have recently demonstrated that phenotypic  
322 differences in metabolic rate play important roles related to both differences in niche  
323 breath of the two species (McFarlane et al 2018) and hybrid dysfunction (McFarlane et  
324 al 2016). Using data from free-living collared, pied and hybrid flycatchers, we  
325 demonstrate distinct divergence in both the mtDNA (Figure 2) and in OXPHOS-related  
326 nDNA (Figure 3) of these species. Both mtDNA and nDNA divergence are significantly  
327 higher than the genome wide median divergence previously estimated for this species  
328 pair (mtDNA  $D_{XY} = 0.033 \pm 0.002$ , nDNA  $D_{XY} = 0.0042 \pm 0.0003$  compared to 0.00013 from  
329 (Ellegren et al 2012). This suggests that both the mitochondrial and nuclear OXPHOS  
330 genes have higher levels of divergence between collared and pied flycatchers than the  
331 average gene in the genome. This divergence could provide at least some of the fuel for  
332 BDMIs between the species affecting hybrid performance.

333 Polymorphisms with different frequencies can also contribute to  
334 incompatibilities between species (Cutter 2012). For example, a polymorphic haplotype  
335 in *Capsella sp.*, which is maintained by balancing selection, results in both compatible  
336 and incompatible hybrid crosses (Sicard et al 2015). Recent work on *Drosophila* suggests  
337 that within species incompatibilities are common and are maintained at low frequencies  
338 through mutation-selection balance (Pool 2015). Incompatibilities will be kept at low  
339 frequencies within species, but could result in hybrid sterility or inviability between  
340 species if different alleles are preferred in each population. We have demonstrated here  
341 polymorphisms (both shared and not shared) in OXPHOS genes (Table S2), which could  
342 contribute to incompatibilities between collared and pied flycatchers.

343 While mitochondrial variation was previously thought to be rapidly purged and  
344 unlikely to influence phenotypic differences in contemporary populations, recent  
345 evidence has suggested that this variation may in fact reflect adaptive processes (Bazin  
346 et al 2006). Mitochondria are gene-dense and there is growing evidence for their non-  
347 neutral evolution (e.g. (Galtier et al 2009, Lamb et al 2018, Morales et al 2015, Ruiz-  
348 Pesini et al 2004). It is difficult to disentangle the effects of selection from the effects of  
349 demographic processes using genomic data alone without using phenotypic data to  
350 support the role of selection (Hill et al 2018, Walsh & Lynch 2018). Our study population  
351 of collared flycatchers went through a recent bottleneck as they colonized the island of  
352 Öland about fifty years ago followed by a drastic population expansion (Kardos et al  
353 2017). In contrast, pied flycatchers were already present on the island and breed further  
354 north as compared to collared flycatchers (Figure 1). We found both higher diversity  
355 and negative values of neutrality tests in mtDNA in pied flycatchers (Table 1,2). This is  
356 not surprising given the larger starting population as well as the fact that the pied  
357 flycatcher population on Öland is not isolated to the same extent as the collared  
358 flycatcher population and hints at selection rather than demography leading to these  
359 patterns. This relatively higher diversity is consistent with the observed adaptive  
360 plasticity in pied flycatcher RMR and could be the result of a better adaptation to the  
361 variable northern climate (McFarlane et al 2018). We interpret the marked divergence  
362 in OXPHOS-related genes (including fixation of different non-synonymous mutations in  
363 mtDNA) together with signs of positive selection in both mitochondrial and nuclear  
364 genes encoding OXPHOS proteins for complex I and III as a legacy of different climate  
365 adaptation from the recent time in allopatry (Qvarnström et al 2016). We found signals  
366 of selection associated with the OXPHOS complex I in both the mitochondrial and  
367 nuclear genomes (Table 2), including evidence for positive selection in ND4 and ND5  
368 (Table 3). A similar pattern was recently found in Australian Eastern Yellow Robins  
369 (*Eopsaltria australis*), where there is a cline of mitonuclear lineages that quickly  
370 diverges (relative to dispersal distance) in a region of climatic transition, suggesting a  
371 link between mtDNA haplotype and environment in this species (Morales et al 2018).  
372 Moreover, a comprehensive meta-analysis identified ND5 as a common site of positive  
373 selection across metazoan lineages (Garvin et al 2015). Taken together, this suggests  
374 that the pattern that we have documented, especially in ND5, may indicate adaptive  
375 changes related to environmental variation.

376            Since the process of mitonuclear co-adaptation likely depends on climate  
377 (Dowling et al 2008), a logical prediction is that interbreeding between populations that  
378 are adapted to different climates may result in hybrid individuals with mismatched  
379 mitonuclear genes (Chou & Leu 2010). Mitonuclear mismatches have recently been  
380 hypothesized to drive reproductive isolation in the context of avian speciation processes  
381 (Hill 2017), but empirical evidence is rare. Some studies on other organisms show that  
382 poorly functioning mitonuclear interactions may lead to various forms of dysfunction  
383 ranging from increased context-dependent metabolic costs (Arnqvist et al 2010,  
384 Hoekstra et al 2013) to reduced fertility and viability of hybrids (Breeuwer & Werren  
385 1995, Ellison & Burton 2010). These studies were all based on experimental crosses  
386 where effects of maternal mtDNA were tested against fully co-evolved versus non-  
387 coevolved nuclear background. Since introgression against a new nuclear background  
388 occurs stepwise in nature, a more likely scenario is that F1 hybrids with only partially  
389 mismatched mitonuclear genomes are already exposed to selection. This is the case with  
390 the sampled F1 *Ficedula* hybrids where mtDNA occurs together with parts of the co-  
391 evolved nuclear genome. If there could be future generations of backcrossing in  
392 flycatchers, then patterns of non-random mitonuclear co-introgression would be  
393 expected to be seen as found in Australian Eastern Yellow Robins (*Eopsaltria australis*)  
394 (Morales et al 2018). These robins range across coastal and inland habitats on the  
395 southwest coast of Australia, including across variable temperature and precipitation  
396 gradients (Morales et al 2018). The underlying expectation is that backcrossed  
397 individuals with mitonuclear mismatches are continuously removed by selection. A large  
398 region of Chromosome 1A, associated with OXPHOS complex I, has co-introgressed with  
399 the associated mitolineage into the contact zone between coastal and inland  
400 populations (Morales et al 2018). This suggests that mitolineage is associated with  
401 climate adaptation in robins, a hypothesis that would be strengthened by the  
402 examination of the association between phenotypic data such as metabolic rate and  
403 these co-introgressing lineages (Hill et al 2018).

404            There are reported cases of metabolic dysfunction in hybrid birds, in addition to  
405 what has been reported in flycatchers. Specifically, captive stone chat hybrids (*Saxicola*  
406 *torquata ssp.*) with mismatched mtDNA and nuclear DNA had different RMR from the  
407 parental types (Tieleman et al 2009), and wild caught black-capped x Carolina

408 chickadees (*Poecile atricapillus* and *P. carolinensis*) had higher mass-corrected RMR than  
409 the parental species (Olson et al 2010). When taken together, the patterns of disrupted  
410 metabolic rate in hybrid flycatchers (McFarlane et al 2016), the divergence that we have  
411 documented in the current study and hybrid sterility in *Ficedula* F1 individuals (Ålund et  
412 al 2013, Svedin et al 2008) suggest that mismatched OXPHOS interactions may have a  
413 functional effect on hybrid fitness.

414 Mitonuclear interactions are a likely candidate for BDMI incompatibilities across  
415 a variety of taxa (Burton and Barreto 2012), and our results are in line with this  
416 suggestion. OXPHOS genes comprise a well characterized, highly conserved gene  
417 network (Rolfe & Brown 1997, van den Heuvel & Smeitink 2001), that nonetheless has  
418 higher than expected levels of divergence between collared and pied flycatchers. This is  
419 consistent with the high level of reproductive isolation between the two flycatcher  
420 species, which have near complete postzygotic isolation after a short period of  
421 divergence. In contrast, the average hybridizing avian species pair still produces fertile  
422 hybrids until approximately 7 million years of divergence (Price & Bouvier 2002). While  
423 we have zoomed in on possible candidates for incompatibilities in this study, we have  
424 not yet found specific mitonuclear BDIMs between the two *Ficedula* species. The  
425 polymorphisms that we found, including those shared between the species, are  
426 candidates for inter-specific incompatibilities

427 If polymorphic incompatibilities resulting in BDIMs were driving hybrid infertility in  
428 *Ficedula* hybrids, then variation in fertility and/or RMR in the F1 generation could be  
429 associated with variation among mismatched mitonuclear genotypes to pinpoint specific  
430 BDIMs. Additionally, we might expect to find some fertile hybrids, as has been  
431 documented both in the above *Capsella* hybrids as well as in *Mus musculus musculus* x *M.*  
432 *m. domesticus* where polymorphic incompatibilities have also been documented (Larson  
433 et al 2018). However, all sampled flycatcher hybrids appear to be infertile (Ålund et al  
434 2013, Svedin et al 2008) suggesting that if there are compatible haplotypes at these loci,  
435 they are rare. In order to specify potential specific mitonuclear BDIMs caused by fixed  
436 differences between the two *Ficedula* species, we would need to use genomic methods  
437 that could restore hybrid fitness such as laboratory methods that would allow us to have  
438 two copies of candidate alleles against an otherwise F1 background. This is, however,  
439 beyond the scope of the current study.

440 At late stages of speciation (i.e. when postzygotic isolation is complete or nearly  
441 complete), it is difficult to tell whether specific incompatibilities have evolved before or  
442 after reproductive isolation (Seehausen et al 2014), as BDMIs tend to ‘snowball’.  
443 Theoretically, it may only take one epistatic interaction stemming from divergence while  
444 in allopatry to lead to complete reproductive isolation (Bateson 1909) (Dobzhansky  
445 1936) (Muller 1942, Müller 1940). After isolation is complete, other incompatibilities  
446 can accumulate, but these are a consequence rather than a cause of reproductive  
447 isolation, leading to the build-up of tens or hundreds of genes involved in  
448 incompatibilities (Presgraves 2003). For example, hundreds of genes affect hybrid  
449 incompatibilities between recently diverged swordtail species (*Xiphophorus birchmanni*  
450 and *X. malinche*) (Schumer et al 2014). While it seems possible that the divergence in  
451 OXPPOS genes is due to differences in climate adaptation between the flycatcher species  
452 (Qvarnström et al 2016), it is premature to conclude whether mitonuclear  
453 incompatibilities are causing postzygotic isolation between the two species.

454 Here, we demonstrate higher than expected divergence between collared and pied  
455 flycatchers in the OXPPOS genes, hinting that these genes may be contributing to the  
456 hybrid metabolic dysfunction previously documented, possibly via BDMIs. We also  
457 found evidence of recent selection, particularly in the mtDNA gene ND5 which is part of  
458 the OXPPOS complex I and appears to be diverging between collared and pied  
459 flycatchers, consistent with selection found in other avian studies. Taken together, this  
460 suggests that metabolic dysfunction resulting from mt-nDNA incompatibilities may be a  
461 factor contributing to hybrid dysfunction in this system.

462



463 **References:**

- 464 Ålund M, Immler S, Rice AM, Qvarnström A. 2013. Low fertility of wild hybrid male  
465 flycatchers despite recent divergence. *Biology letters* 9: 20130169
- 466 Amer SAM, Ahmed MM, Shobrak M. 2013. Efficient newly designed primers for the  
467 amplification and sequencing of bird mitochondrial genomes. *Bioscience,*  
468 *Biotechnology, and Biochemistry* 77: 577-81
- 469 Arnqvist G, Dowling DK, Eady P, Gay L, Tregenza T, et al. 2010. Genetic architecture of  
470 metabolic rate: environment specific epistasis between mitochondrial and  
471 nuclear genes in an insect. *Evolution* 64: 3354-63
- 472 Bandelt H-J, Forster P, Röhl A. 1999. Median-joining networks for inferring intraspecific  
473 phylogenies. *Molecular Biology and Evolution* 16: 37-48
- 474 Bateson W. 1909. Heredity and variation in modern lights. *Darwin and modern science*
- 475 Bazin E, Glémin S, Galtier N. 2006. Population size does not influence mitochondrial  
476 genetic diversity in animals. *Science* 312: 570-72
- 477 BioSoft H. 2013. DNA Sequence Assembler v4.
- 478 Bozinovic F, Calosi P, Spicer JI, Bozinovic F, Calosi P, Spicer JI. 2011. Physiological  
479 correlates of geographic range in animals. *Annual review of ecology, evolution and*  
480 *systematics* 42: 155-79
- 481 Breeuwer JA, Werren JH. 1995. Hybrid breakdown between two haplodiploid species:  
482 the role of nuclear and cytoplasmic genes. *Evolution* 49: 705-17
- 483 Brideau NJ, Flores HA, Wang J, Maheshwari S, Wang X, Barbash DA. 2006. Two  
484 Dobzhansky-Muller genes interact to cause hybrid lethality in *Drosophila*. *Science*  
485 314: 1292-95
- 486 Brown WM, George M, Jr., Wilson AC. 1979. Rapid evolution of animal mitochondrial  
487 DNA. *Proceedings of the National Academy of Sciences* 76: 1967-71
- 488 Burri R, Nater A, Kawakami T, Mugal CF, Olason PI, et al. 2015. Linked selection and  
489 recombination rate variation drive the evolution of the genomic landscape of  
490 differentiation across the speciation continuum of *Ficedula* flycatchers. *Genome*  
491 *research* 25: 1656-65
- 492 Burton RS, Barreto FS. 2012. A disproportionate role for mtDNA in Dobzhansky-Muller  
493 incompatibilities? *Molecular ecology* 21: 4942-57

- 494 Cammen KM, Schultz TF, Rosel PE, Wells RS, Read AJ. 2015. Genomewide investigation  
495 of adaptation to harmful algal blooms in common bottlenose dolphins (*Tursiops*  
496 *truncatus*). *Molecular Ecology* 24: 4697-710
- 497 Chou JY, Leu JY. 2010. Speciation through cytonuclear incompatibility: insights from  
498 yeast and implications for higher eukaryotes. *Bioessays* 32: 401-11
- 499 Cutter AD. 2012. The polymorphic prelude to Bateson–Dobzhansky–Muller  
500 incompatibilities. *Trends in ecology & evolution* 27: 209-18
- 501 Dobzhansky T. 1936. Studies of hybrid sterility. II. Localization of sterility factors in  
502 *Drosophila pseudoobscura* hybrids. *Genetics* 21: 113-35
- 503 Dowling DK, Friberg U, Lindell J. 2008. Evolutionary implications of non-neutral  
504 mitochondrial genetic variation. *Trends in ecology & evolution* 23: 546-54
- 505 Ekblom R, Smeds L, Ellegren H. 2014. Patterns of sequencing coverage bias revealed by  
506 ultra-deep sequencing of vertebrate mitochondria. *BMC Genomics* 15: 1-9
- 507 Ellegren H, Smeds L, Burri R, Olason PI, Backström N, et al. 2012. The genomic landscape  
508 of species divergence in *Ficedula* flycatchers. *Nature* 491: 756-60
- 509 Ellison C, Burton R. 2010. Cytonuclear conflict in interpopulation hybrids: the role of  
510 RNA polymerase in mtDNA transcription and replication. *Journal of evolutionary*  
511 *biology* 23: 528-38
- 512 Fishman L, Willis JH. 2001. Evidence for Dobzhansky-Muller incompatibilities  
513 contributing to the sterility of hybrids between *Mimulus gattatus* and *M. nastus*  
514 *Evolution* 55: 1932-42
- 515 Fu Y-X, Li W-H. 1993. Statistical tests of neutrality of mutations. *Genetics* 133: 693-709
- 516 Galtier N, Nabholz B, Glémin S, Hurst GDD. 2009. Mitochondrial DNA as a marker of  
517 molecular diversity: a reappraisal. *Molecular Ecology* 18: 4541-50
- 518 Garvin MR, Bielawski JP, Sazanov LA, Gharrett AJ. 2015. Review and meta-analysis of  
519 natural selection in mitochondrial complex I in metazoans. *Journal of Zoological*  
520 *Systematics and Evolutionary Research* 53: 1-17
- 521 Gershoni M, Templeton AR, Mishmar D. 2009. Mitochondrial bioenergetics as a major  
522 motive force of speciation. *Bioessays* 31: 642-50
- 523 Hill GE. 2017. The mitonuclear compatibility species concept. *The Auk* 134: 393-409
- 524 Hill GE, Havird JC, Sloan DB, Burton RS, Greening C, Dowling DK. 2018. Assessing the  
525 fitness consequences of mitonuclear interactions in natural populations.  
526 *Biological Reviews*

- 527 Hoekstra LA, Siddiq MA, Montooth KL. 2013. Pleiotropic Effects of a Mitochondrial-  
528 Nuclear Incompatibility Depend upon the Accelerating Effect of Temperature in  
529 *Drosophila*. *Genetics* 195: 1129-39
- 530 Kardos M, Qvarnström A, Ellegren H. 2017. Inferring Individual Inbreeding and  
531 Demographic History from Segments of Identity by Descent in *Ficedula*  
532 Flycatcher Genome Sequences. *Genetics* 205: 1319-34
- 533 Korneliussen TS, Albrechtsen A, Nielsen R. 2014. ANGSD: analysis of next generation  
534 sequencing data. *BMC bioinformatics* 15: 356
- 535 Kosakovsky Pond SL, Frost SDW, Muse SV. 2005. HyPhy: Hypothesis testing using  
536 phylogenies. *Bioinformatics* 21: 676-79
- 537 Lamb AM, Gan HM, Greening C, Joseph L, Lee Yin P, et al. 2018. Climate-driven  
538 mitochondrial selection: A test in Australian songbirds. *Molecular Ecology* 27:  
539 898-918
- 540 Larson EL, Vanderpool D, Sarver BA, Callahan C, Keeble S, et al. 2018. The evolution of  
541 polymorphic hybrid incompatibilities in house mice. *Genetics* 209: 845-59
- 542 Larsson A. 2014. AliView: A fast and lightweight alignment viewer and editor for large  
543 datasets. *Bioinformatics* 30: 3276-78
- 544 Leigh JW, Bryant D. 2015. POPART: Full-feature software for haplotype network  
545 construction. *Methods in Ecology and Evolution* 6: 1110-16
- 546 McFarlane SE, Ålund M, Sirkiä PM, Qvarnström A. 2018. Difference in plasticity of resting  
547 metabolic rate—the proximate explanation to different niche breadth in sympatric  
548 *Ficedula* flycatchers. *Ecology and Evolution* 8: 4575-86
- 549 McFarlane SE, Sirkiä PM, Ålund M, Qvarnström A. 2016. Hybrid Dysfunction Expressed  
550 as Elevated Metabolic Rate in Male *Ficedula* Flycatchers. *PLOS ONE* 11: e0161547
- 551 Mishmar D, Ruiz-Pesini E, Golik P, Macaulay V, Clark AG, et al. 2003. Natural selection  
552 shaped regional mtDNA variation in humans. *Proceedings of the National*  
553 *Academy of Sciences* 100: 171-76
- 554 Morales HE, Pavlova A, Amos N, Major R, Kilian A, et al. 2018. Concordant divergence of  
555 mitogenomes and a mitonuclear gene cluster in bird lineages inhabiting different  
556 climates. *Nature ecology & evolution* 2: 1258
- 557 Morales HE, Pavlova A, Joseph L, Sunnucks P. 2015. Positive and purifying selection in  
558 mitochondrial genomes of a bird with mitonuclear discordance. *Molecular*  
559 *Ecology* 24: 2820-37

- 560 Muller H. *Biol. Symp.*1942, 6: 71-125.
- 561 Müller HJ. 1940. Bearing of the Drosophila work on systematics. In *The New Systematic*,  
562 ed. JS Huxley, pp. 185-268: Clarendon Press, Oxford
- 563 Murrell B, Moola S, Mabona A, Weighill T, Sheward D, et al. 2013. FUBAR: A fast,  
564 unconstrained bayesian AppRoximation for inferring selection. *Molecular Biology*  
565 *and Evolution* 30: 1196-205
- 566 Murrell B, Wertheim JO, Moola S, Weighill T, Scheffler K, Kosakovsky Pond SL. 2012.  
567 Detecting individual sites subject to episodic diversifying selection. *PLoS Genetics*  
568 8
- 569 Nadachowska-Brzyska K, Burri R, Olason PI, Kawakami T, Smeds L, Ellegren H. 2013.  
570 Demographic divergence history of pied flycatcher and collared flycatcher  
571 inferred from whole-genome re-sequencing data. *PLoS Genetics* 9: e1003942
- 572 Olson JR, Cooper SJ, Swanson DL, Braun MJ, Williams JB. 2010. The Relationship of  
573 Metabolic Performance and Distribution in Black-Capped and Carolina  
574 Chickadees. *Physiological and Biochemical Zoology* 83: 263-75
- 575 Pool JE. 2015. The mosaic ancestry of the Drosophila genetic reference panel and the D.  
576 melanogaster reference genome reveals a network of epistatic fitness  
577 interactions. *Molecular biology and evolution* 32: 3236-51
- 578 Presgraves DC. 2003. A fine-scale genetic analysis of hybrid incompatibilities in  
579 Drosophila. *Genetics* 163: 955-72
- 580 Price TD, Bouvier MM. 2002. The evolution of F1 postzygotic incompatibilities in birds.  
581 *Evolution* 56: 2083-89
- 582 Qvarnström A, Ålund M, McFarlane SE, Sirkiä PM. 2016. Climate adaptation and  
583 speciation: particular focus on reproductive barriers in Ficedula flycatchers.  
584 *Evolutionary applications* 9: 119-34
- 585 Qvarnström A, Rice AM, Ellegren H. 2010. Speciation in Ficedula flycatchers.  
586 *Philosophical Transactions of the Royal Society B: Biological Sciences* 365: 1841-52
- 587 Qvarnström A, Wiley C, Svedin N, Vallin N. 2009. Life-history divergence facilitates  
588 regional coexistence of competing Ficedula flycatchers. *Ecology* 90: 1948-57
- 589 R Core Team. 2017. R: A language and environment for statistical computing. R  
590 *Foundation for Statistical Computing, Vienna, Austria. URL* [http://www.R-](http://www.R-project.org/)  
591 [project.org/](http://www.R-project.org/).

- 592 Rand DM, Haney RA, Fry AJ. 2004. Cytonuclear coevolution: the genomics of cooperation.  
593 *Trends in Ecology & Evolution* 19: 645-53
- 594 Rolfe D, Brown GC. 1997. Cellular energy utilization and molecular origin of standard  
595 metabolic rate in mammals. *Physiological reviews* 77: 731-58
- 596 Rozas J, Ferrer-Mata A, Sánchez-DelBarrio JC, Guirao-Rico S, Librado P, et al. 2017.  
597 DnaSP 6: DNA sequence polymorphism analysis of large data sets. *Molecular*  
598 *biology and evolution* 34: 3299-302
- 599 Ruiz-Pesini E, Mishmar D, Brandon M, Procaccio V, Wallace DC. 2004. Effects of purifying  
600 and adaptative selection on regional variation in human mtDNA. *Science* 303:  
601 223-26
- 602 Ryman N, Jorde PE. 2001. Statistical power when testing for genetic differentiation.  
603 *Molecular Ecology* 10: 2361-73
- 604 Ryman N, Palm S, André C, Carvalho GR, Dahlgren TG, et al. 2006. Power for detecting  
605 genetic divergence : differences between statistical methods and marker loci.  
606 *Molecular Ecology* 15: 2031-45
- 607 Schumer M, Cui R, Powell DL, Dresner R, Rosenthal GG, Andolfatto P. 2014. High-  
608 resolution mapping reveals hundreds of genetic incompatibilities in hybridizing  
609 fish species. *Elife* 3: e02535
- 610 Seehausen O, Butlin RK, Keller I, Wagner CE, Boughman JW, et al. 2014. Genomics and  
611 the origin of species. *Nature Reviews Genetics* 15: 176
- 612 Sicard A, Kappel C, Josephs EB, Lee YW, Marona C, et al. 2015. Divergent sorting of a  
613 balanced ancestral polymorphism underlies the establishment of gene-flow  
614 barriers in *Capsella*. *Nature communications* 6: 7960
- 615 Sirkiä PM, McFarlane SE, Jones W, Wheatcroft D, Ålund M, et al. 2018. Climate-driven  
616 build-up of temporal isolation within a recently formed avian hybrid zone.  
617 *Evolution* 72: 363-74
- 618 Smeitink JAM, Sengers RCA, Trijbels JMF. 2004. *Oxidative phosphorylation in health and*  
619 *disease*. Kluwer academic / Plenum publishers.
- 620 Svedin N, Wiley C, Veen T, Gustafsson L, Qvarnström A. 2008. Natural and sexual  
621 selection against hybrid flycatchers. *Proceedings of the Royal Society of London B:*  
622 *Biological Sciences* 275: 735-44
- 623 Tajima F. 1989. Statistical method for testing the neutral mutation hypothesis by DNA  
624 polymorphism. *Genetics* 123: 585-95

- 625 Tieleman BI, Versteegh MA, Fries A, Helm B, Dingemanse NJ, et al. 2009. Genetic  
626 modulation of energy metabolism in birds through mitochondrial function.  
627 *Proceedings of the Royal Society of London B: Biological Sciences* 276: 1685-93
- 628 Vaidya G, Lohman DJ, Meier R. 2011. Cladistics multi-gene datasets with character set  
629 and codon information. *Cladistics* 27: 171-80
- 630 Vallin N, Rice AM, Bailey RI, Husby A, Qvarnström A. 2012. Positive feedback between  
631 ecological and reproductive character displacement in a young avian hybrid zone.  
632 *Evolution* 66: 1167-79
- 633 van den Heuvel L, Smeitink J. 2001. The oxidative phosphorylation (OXPHOS) system:  
634 nuclear genes and human genetic diseases. *Bioessays* 23: 518-25
- 635 Walsh B, Lynch M. 2018. *Evolution and selection of quantitative traits*. Oxford University  
636 Press.
- 637 Weaver S, Shank SD, Spielman SJ, Li M, Muse SV, Kosakovsky Pond SL. 2018.  
638 Datamonkey 2.0: A modern web application for characterizing selective and  
639 other evolutionary processes. *Molecular Biology and Evolution* 35: 773-77
- 640 Willett CS, Burton RS. 2001. Viability of Cytochrome C genotypes depends on  
641 cytoplasmic backgrounds in *Tigriopus californicus*. *Evolution* 55: 1592-99
- 642 Yang Z. 2007. PAML 4: Phylogenetic analysis by maximum likelihood. *Molecular Biology  
643 and Evolution* 24: 1586-91
- 644
- 645

646 **Abbreviations:**

647

648 mtDNA = mitochondrial DNA

649 nDNA = nuclear DNA

650 BDMI = Bateson Dobzhansky Muller incompatibilities

651 RMR = resting metabolic rate

652 OXPHOS = oxidative phosphorylation pathway

653 FL $F^*$  = Fu's and Li's  $F^*$  statistic

654 FL $D^*$  = Fu's and Li's  $D^*$  statistic

655 SNP = single nucleotide polymorphism

656

657 **Tables:**

| <b>Table 1. Genetic diversity and divergence</b>                                                                                                                                                                                                                                                                                                                     |                 |          |                |                              |                                 |          |
|----------------------------------------------------------------------------------------------------------------------------------------------------------------------------------------------------------------------------------------------------------------------------------------------------------------------------------------------------------------------|-----------------|----------|----------------|------------------------------|---------------------------------|----------|
| Pop = gene-population; Seg = segregating sites, (st) = singletons; H = number of haplotypes; Hd = haplotype diversity; $\pi$ = nucleotide diversity; $D_{XY}$ = average number of nucleotide substitutions per site between populations (with Jukes-Cantor adjustment); k = average number of nucleotide differences between populations; (SD) = standard deviation. |                 |          |                |                              |                                 |          |
| <b>Pop</b>                                                                                                                                                                                                                                                                                                                                                           | <b>Seg (st)</b> | <b>H</b> | <b>Hd (SD)</b> | <b><math>\pi</math> (SD)</b> | <b><math>D_{XY}</math> (SD)</b> | <b>k</b> |
| <i>MT-collared</i>                                                                                                                                                                                                                                                                                                                                                   | 39 (13)         | 18       | 0.976 (0.020)  | 0.00148 (0.00020)            | 0.03302<br>(0.00244)            | 174.745  |
| <i>MT-pied</i>                                                                                                                                                                                                                                                                                                                                                       | 65 (55)         | 22       | 1.000 (0.014)  | 0.00162 (0.00015)            |                                 |          |
| <i>Nuc-collared</i>                                                                                                                                                                                                                                                                                                                                                  | 311 (113)       | 19       | 1.000 (0.017)  | 0.00280 (0.00008)            | 0.00422<br>(0.00031)            | 107.125  |
| <i>Nuc-pied</i>                                                                                                                                                                                                                                                                                                                                                      | 254 (88)        | 19       | 1.000 (0.017)  | 0.00269 (0.00008)            |                                 |          |

658

659



660

| <b>Table 2. Neutrality tests per gene and per species</b>                                                                                                                                                                                                           |                      |           |            |                  |           |            |
|---------------------------------------------------------------------------------------------------------------------------------------------------------------------------------------------------------------------------------------------------------------------|----------------------|-----------|------------|------------------|-----------|------------|
| FLD* = Fu and Li's D* statistic; FLF* = Fu and Li's F statistic; Tajima's D = Tajima's D neutrality statistic. Red indicates negative and significant (* = P<0.5; ** = P<0.02; *** = P<0.001), yellow is negative, green is positive, black is zero (no variation). |                      |           |            |                  |           |            |
| An asterisk after the gene-name (for a mitochondrial gene) indicates only extracted data was available for that gene.                                                                                                                                               |                      |           |            |                  |           |            |
|                                                                                                                                                                                                                                                                     | Collared flycatchers |           |            | Pied flycatchers |           |            |
| Gene                                                                                                                                                                                                                                                                | FLD*                 | FLF*      | Tajima's D | FLD*             | FLF*      | Tajima's D |
| <b>Complex I</b>                                                                                                                                                                                                                                                    |                      |           |            |                  |           |            |
| <b>Mitochondrial genes</b>                                                                                                                                                                                                                                          |                      |           |            |                  |           |            |
| <i>12S</i>                                                                                                                                                                                                                                                          | -3.9861**            | -3.7507** | -1.6038    | -2.9181*         | -3.0771** | -1.9825*   |
| <i>16S</i>                                                                                                                                                                                                                                                          | -4.8867**            | -4.6199** | -1.9670*   | -3.2516*         | -3.3062** | -1.8781*   |
| <i>ND1</i>                                                                                                                                                                                                                                                          | -1.4105              | -1.4268   | -0.8288    | -1.8862          | -2.02957  | -1.3919    |
| <i>ND2</i>                                                                                                                                                                                                                                                          | -0.7600              | -0.5738   | 0.0085     | -3.2898*         | -3.4395** | -2.1575*   |
| <i>ND3</i>                                                                                                                                                                                                                                                          | 0.7833               | 0.8868    | 0.6837     | -1.7805          | -1.7956   | -0.9906    |
| <i>ND4</i>                                                                                                                                                                                                                                                          | -1.1539              | -1.3518   | -1.0953    | -3.1051*         | -2.9786*  | -1.3157    |
| <i>ND4L</i>                                                                                                                                                                                                                                                         | -2.9365*             | -2.7376*  | -1.1157    | -1.7957          | -2.0368   | -1.6790    |
| <i>ND5*</i>                                                                                                                                                                                                                                                         | -0.6283              | -0.5671   | -0.1460    | -0.8218          | -1.1716   | -1.5168    |
| <i>ND6</i>                                                                                                                                                                                                                                                          | -1.8019              | -1.9108   | -1.2470    | -2.6773*         | -2.8955*  | -2.0574*   |
| <b>Nuclear genes</b>                                                                                                                                                                                                                                                |                      |           |            |                  |           |            |
| <i>NDUFA2</i>                                                                                                                                                                                                                                                       | 0.0000               | 0.0000    | -          | 0.0000           | 0.0000    | -          |
| <i>NDUFA4</i>                                                                                                                                                                                                                                                       | -1.5203              | -1.6305   | -1.1648    | 0.0000           | 0.0000    | -          |
| <i>NDUFA5</i>                                                                                                                                                                                                                                                       | -0.5736              | -0.8252   | -1.1200    | 0.0000           | 0.0000    | -          |
| <i>NDUFA6</i>                                                                                                                                                                                                                                                       | 0.0000               | 0.0000    | -          | 0.0000           | 0.0000    | -          |
| <i>NDUFA8</i>                                                                                                                                                                                                                                                       | -1.5203              | -1.6305   | -1.1648    | 0.0000           | 0.0000    | -          |
| <i>NDUFA11</i>                                                                                                                                                                                                                                                      | 0.8750               | 0.6152    | -0.3872    | 0.0000           | 0.0000    | -          |

|                            |           |           |          |           |           |           |
|----------------------------|-----------|-----------|----------|-----------|-----------|-----------|
| <i>NDUFB1</i>              | -0.7823   | -0.7997   | -0.4626  | 0.0094    | -0.0096   | -0.0526   |
| <i>NDUFB3</i>              | -0.5736   | -0.6302   | -0.4849  | -0.1052   | -0.0231   | 0.2079    |
| <i>NDUFB6</i>              | 0.0000    | 0.0000    | -        | 0.0000    | 0.0000    | -         |
| <i>NDUFB9</i>              | -1.5203   | -1.6305   | -1.1648  | 0.0000    | 0.0000    | -         |
| <i>NDUFB10</i>             | 0.0000    | 0.0000    | -        | 0.6578    | 0.6794    | 0.4171    |
| <i>NDUFS1</i>              | 1.3036    | 1.1186    | 0.1123   | -2.2054   | -2.3859   | -1.7153   |
| <i>NDUFS4</i>              | -1.2251   | -1.4688   | -1.4224  | 0.6578    | 0.6794    | 0.4171    |
| <i>NDUFS5</i>              | 0.0000    | 0.0000    | -        | 0.0000    | 0.0000    | -         |
| <i>NDUFS7</i>              | 0.0000    | 0.0000    | -        | 0.0000    | 0.0000    | -         |
| <i>NDUFS8</i>              | 0.2317    | 0.2508    | 0.1800   | 0.0000    | 0.0000    | -         |
| <i>NDUFV1</i>              | 0.0000    | 0.0000    | -        | 0.0000    | 0.0000    | -         |
| <i>NDUFV2</i>              | 0.2317    | 0.4161    | 0.6868   | -0.1432   | -0.1610   | -0.1294   |
| <b>Complex III</b>         |           |           |          |           |           |           |
| <b>Mitochondrial genes</b> |           |           |          |           |           |           |
| <i>CytB</i>                | -3.3245** | -3.3030** | -1.8579* | -4.2346** | -4.3038** | -2.4301** |
| <b>Nuclear genes</b>       |           |           |          |           |           |           |
| <i>UQCRQ</i>               | 0.0000    | 0.0000    | -        | 0.0000    | 0.0000    | -         |
| <i>UQCRC2</i>              | -0.0279   | -0.1423   | -0.3585  | -0.7259   | -0.6050   | -0.0146   |
| <i>UQCR10</i>              | 0.0000    | 0.0000    | -        | 0.0000    | 0.0000    | -         |
| <i>UQCR11</i>              | 0.0000    | 0.0000    | -        | 0.0000    | 0.0000    | -         |
| <b>Complex IV</b>          |           |           |          |           |           |           |
| <b>Mitochondrial genes</b> |           |           |          |           |           |           |
| <i>CO1</i>                 | -0.9560   | -1.1432   | -0.9752  | -3.1892*  | -3.1586*  | -1.6174   |
| <i>CO2*</i>                | -0.7312   | -0.6848   | -0.2363  | -2.1748   | -2.4100   | -1.8566*  |
| <i>CO3</i>                 | -1.6433   | -1.6085   | -0.7830  | -4.1893** | -4.2057** | -2.2952** |
| <b>Nuclear genes</b>       |           |           |          |           |           |           |

|                                |         |         |          |           |           |           |
|--------------------------------|---------|---------|----------|-----------|-----------|-----------|
| <i>COX4I1</i>                  | -0.5736 | -0.4201 | 0.1991   | -1.5203   | -1.6305   | -1.1648   |
| <i>COX6C2</i>                  | 0.0000  | 0.0000  | -        | 0.6578    | 0.3850    | -0.5622   |
| <i>COX7A</i>                   | 0.6578  | 0.3850  | -0.5622  | 0.6578    | 0.6794    | 0.4171    |
| <i>COX7B</i>                   | 0.0000  | 0.0000  | -        | 0.0000    | 0.0000    | -         |
| <i>COX7C</i>                   | 0.0000  | 0.0000  | -        | 0.0000    | 0.0000    | -         |
| <b>Complex V</b>               |         |         |          |           |           |           |
| <b>Mitochondrial genes</b>     |         |         |          |           |           |           |
| <i>ATP6</i>                    | -1.7066 | -2.1458 | -1.9573* | -4.7183** | -4.6629** | -2.3910** |
| <i>ATP8*</i>                   | 0.6578  | 0.6794  | 0.4171   | 0.0000    | 0.0000    | -         |
| <b>Nuclear genes</b>           |         |         |          |           |           |           |
| <i>ATP5F1B</i>                 | 0.6578  | 0.3850  | -0.5622  | 0.8750    | 1.1103    | 1.2249    |
| <i>ATP5F1C</i>                 | 0.8750  | 1.0353  | 0.9807   | -0.5736   | -0.4951   | -0.0452   |
| <i>ATP5MF</i>                  | 0.0000  | 0.0000  | -        | 0.0000    | 0.0000    | -         |
| <i>ATP5MG</i>                  | 0.0000  | 0.0000  | -        | 0.0000    | 0.0000    | -         |
| <i>ATP5PB</i>                  | 0.0000  | 0.0000  | -        | 0.0000    | 0.0000    | -         |
| <i>ATP5PD</i>                  | 0.0000  | 0.0000  | -        | -2.0222   | -2.1606   | -1.5108   |
| <i>ATP5PF</i>                  | 0.6578  | 0.8832  | 1.0951   | 0.6578    | 0.7926    | 0.7938    |
| <b>Concatenated alignments</b> |         |         |          |           |           |           |
| <i>All nuclear</i>             | -0.3591 | -0.4120 | -0.3404  | -0.2638   | -0.2290   | -0.0391   |
| <i>All MT</i>                  | -0.3045 | -0.4738 | -0.6294  | -3.3702** | -3.4298** | -1.9422*  |

661

662

| <b>Table 3. Sites with positive selection</b>                                                                                                                                                                                                                                                                                                                                                                 |              |              |                  |      |             |              |
|---------------------------------------------------------------------------------------------------------------------------------------------------------------------------------------------------------------------------------------------------------------------------------------------------------------------------------------------------------------------------------------------------------------|--------------|--------------|------------------|------|-------------|--------------|
| We used three programs to identify sites with positive selection, namely CodeML, MEME and FUBAR. A likelihood-ratio test (LRT) in CodeML calculated whether models with positive selection were more likely than models without positive selection. When this test was not significant, and positive selection was thus not more likely than no selection, the identified 'positive sites' were not accepted. |              |              |                  |      |             |              |
| In the 'total' column, only sites are mentioned where the LRT indicates selection and that were identified by at least two methods (the models in CodeML count as a method each). BEB = Bayesian Empirical Bayes-method.                                                                                                                                                                                      |              |              |                  |      |             |              |
| The genes for which there is no coding variation are not included in this analysis.                                                                                                                                                                                                                                                                                                                           |              |              |                  |      |             |              |
| An asterisk after the gene-name (for a mitochondrial gene) indicates only extracted data was available for that gene.                                                                                                                                                                                                                                                                                         |              |              |                  |      |             |              |
| Gene                                                                                                                                                                                                                                                                                                                                                                                                          | CodeML       |              |                  | MEME | FUBAR       | Total        |
|                                                                                                                                                                                                                                                                                                                                                                                                               | LRT          | BEB model 2  | BEB model 8      |      |             |              |
| <b>Complex I</b>                                                                                                                                                                                                                                                                                                                                                                                              |              |              |                  |      |             |              |
| <b>Mitochondrial DNA</b>                                                                                                                                                                                                                                                                                                                                                                                      |              |              |                  |      |             |              |
| ND1                                                                                                                                                                                                                                                                                                                                                                                                           | Selection    | 20           | 20               | 20   | 20          | 20           |
| ND2                                                                                                                                                                                                                                                                                                                                                                                                           | No selection | X            | X                | 30   | X           | No selection |
| ND3                                                                                                                                                                                                                                                                                                                                                                                                           | No selection | X            | X                | X    | X           | No selection |
| ND4                                                                                                                                                                                                                                                                                                                                                                                                           | Selection    | 4, 10, 14    | 4, 10, 14, 18    | X    | 4           | 4, 10, 14    |
| ND4L                                                                                                                                                                                                                                                                                                                                                                                                          | No selection | X            | X                | X    | X           | No selection |
| ND5*                                                                                                                                                                                                                                                                                                                                                                                                          | Selection    | 13,350,577   | 13,350,577       | 34   | X           | 13,350,577   |
| ND6                                                                                                                                                                                                                                                                                                                                                                                                           | No selection | X            | X                | X    | X           | No selection |
| <b>Nuclear DNA</b>                                                                                                                                                                                                                                                                                                                                                                                            |              |              |                  |      |             |              |
| NDUFA5                                                                                                                                                                                                                                                                                                                                                                                                        | Selection    | 63           | 63               | X    | X           | 63           |
| NDUFB3                                                                                                                                                                                                                                                                                                                                                                                                        | Selection    | 8, 57, 99    | 8, 57, 99        | X    | 57          | 8, 57, 99    |
| NDUFS1                                                                                                                                                                                                                                                                                                                                                                                                        | Selection    | 22, 529      | 22               | X    | X           | 22           |
| NDUFS5                                                                                                                                                                                                                                                                                                                                                                                                        | No selection | X            | 287              | X    | X           | No selection |
| NDUFS7                                                                                                                                                                                                                                                                                                                                                                                                        | Selection    | 21           | 21               | X    | 21          | 21           |
| NDUFV1                                                                                                                                                                                                                                                                                                                                                                                                        | Selection    | 7            | 7                | X    | 7           | 7            |
| <i>No coding variation: NDUFA2, NDUFA4, NDUFA6, NDUFA8, NDUFA11, NDUFB6, NDUFB9, NDUFB10, NDUFV2</i>                                                                                                                                                                                                                                                                                                          |              |              |                  |      |             |              |
| <b>Complex III</b>                                                                                                                                                                                                                                                                                                                                                                                            |              |              |                  |      |             |              |
| <b>Mitochondrial DNA</b>                                                                                                                                                                                                                                                                                                                                                                                      |              |              |                  |      |             |              |
| CytB                                                                                                                                                                                                                                                                                                                                                                                                          | Selection    | 23, 31, 265  | 23, 31, 265      | 265  | 31, 265     | 23, 31, 265  |
| <b>Nuclear DNA</b>                                                                                                                                                                                                                                                                                                                                                                                            |              |              |                  |      |             |              |
| UQCRC2                                                                                                                                                                                                                                                                                                                                                                                                        | Selection    | 2, 188, 311, | 2, 188, 311, 341 | 2    | 2, 188, 341 | 2, 188, 311, |

|                                                                              |              |            |            |    |        |              |
|------------------------------------------------------------------------------|--------------|------------|------------|----|--------|--------------|
|                                                                              |              | 341        |            |    |        | 341          |
| <i>No coding variation: UQCRQ, UQCR10, UQCR11</i>                            |              |            |            |    |        |              |
| <b>Complex IV</b>                                                            |              |            |            |    |        |              |
| <b>Mitochondrial DNA</b>                                                     |              |            |            |    |        |              |
| <i>CO1</i>                                                                   | Selection    | 5, 27, 280 | 5, 27, 280 | 5  | 27     | 5, 27, 280   |
| <i>CO2*</i>                                                                  | No selection | X          | X          | X  | X      | No selection |
| <i>CO3</i>                                                                   | Selection    | 10, 12, 18 | 10, 12, 18 | 12 | 12     | 10, 12, 18   |
| <b>Nuclear DNA</b>                                                           |              |            |            |    |        |              |
| <i>No coding variation: COX4I1, COX6C2, COX7A, COX7B, COX7C</i>              |              |            |            |    |        |              |
| <b>Complex V</b>                                                             |              |            |            |    |        |              |
| <b>Mitochondrial DNA</b>                                                     |              |            |            |    |        |              |
| <i>ATP6</i>                                                                  | No selection | 5, 13      | 5, 7, 13   | 13 | 13, 46 | No selection |
| <i>ATP8*</i>                                                                 | No selection | X          | X          | X  | X      | No selection |
| <b>Nuclear DNA</b>                                                           |              |            |            |    |        |              |
| <i>ATP5PF</i>                                                                | Selection    | 30         | 30         | X  | X      | 30           |
| <i>No coding variation: ATP5F1B, ATP5F1C, ATP5MF, ATP5MG, ATP5PB, ATP5PD</i> |              |            |            |    |        |              |

663

664

665 **Figure Captions:**

666 **Figure 1: A.** The distribution of *Ficedula* flycatchers in Europe. The distribution of pied  
667 flycatchers is indicated by blue, whereas the distribution of the collared flycatchers is  
668 indicated by red. The sympatric range is indicated in purple. Our study site is Öland, as  
669 enlarged in the image. **B.** A male collared flycatcher (black with a white belly, a white  
670 collar, a white forehead patch and white on its wings). **C.** A hybrid male (intermediate  
671 plumage; a broken white collar). **D.** A male pied flycatcher (black or brown with a white  
672 belly and a small white forehead patch).

673

674 **Figure 2.** A haplotype network with all individuals based on concatenated alignment of  
675 the genes ND1, ND2, ND3, ND4, ATP and 12S. Larger circles indicate several individuals  
676 have the same haplotype. The reference sequence is present in the circle indicated by  
677 'CF-10'. Perpendicular bars on the edges indicate the number of differences that  
678 separates the two haplotypes. Collared and pied flycatchers cluster together based on  
679 species.

680 **Figure 3.** A haplotype network with all individuals based on concatenated alignment of  
681 the nuclear OXPHOS-related genes. No individuals share the same haplotype.  
682 Perpendicular bars on the edges indicate the number of differences that separates the  
683 two haplotypes. Collared and pied flycatchers cluster together based on species.

684 **Figure 4.** Manhattan plot with P-values of the Fisher's Exact test for all shared SNPs. The  
685 Y-axis is the  $-\log(P\text{-value})$ , and the X-axis corresponds to the complex each SNP is a part  
686 of. Black and grey SNPs are located on the nDNA, whereas orange SNPs are located on  
687 the mtDNA. The blue dashed line indicates  $P=0.05$  and the red line indicates  $P=0.05/179$   
688 (P-value with Bonferroni correction), all SNPs above the red line are significantly  
689 different between the two species after accounting for multiple testing.

bioRxiv preprint doi: <https://doi.org/10.1101/588756>; this version posted March 29, 2019. The copyright holder for this preprint (which was not certified by peer review) is the author/funder, who has granted bioRxiv a license to display the preprint in perpetuity. It is made available under aCC-BY-NC-ND 4.0 International license.

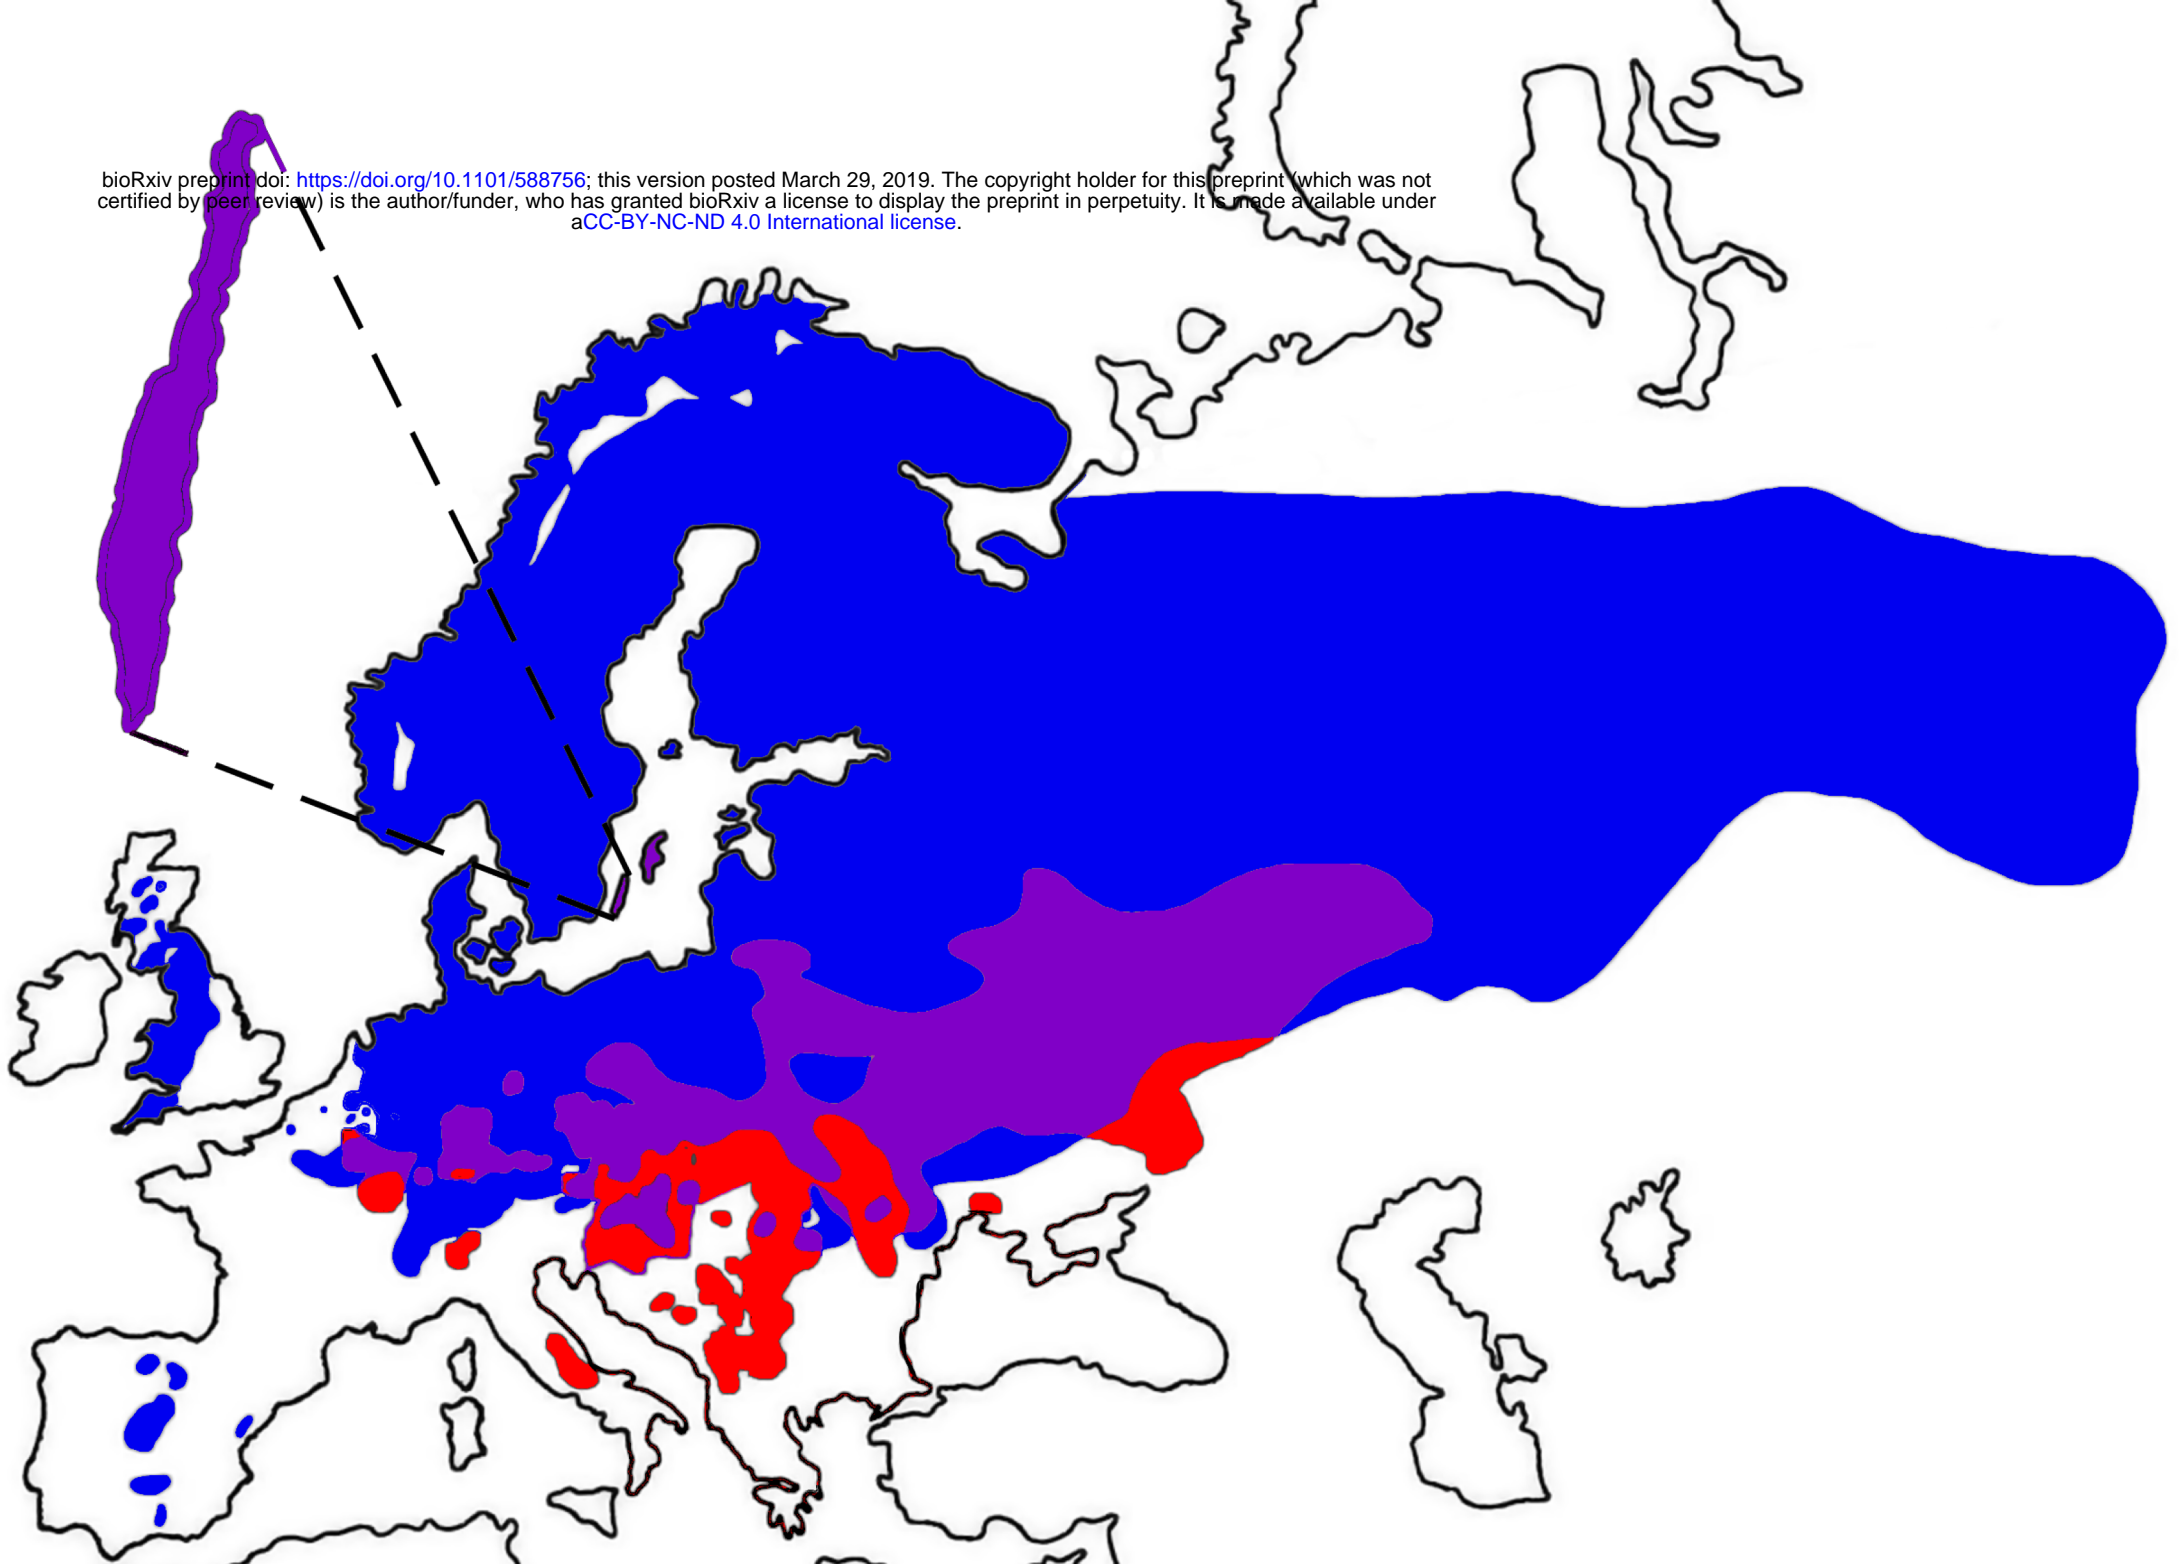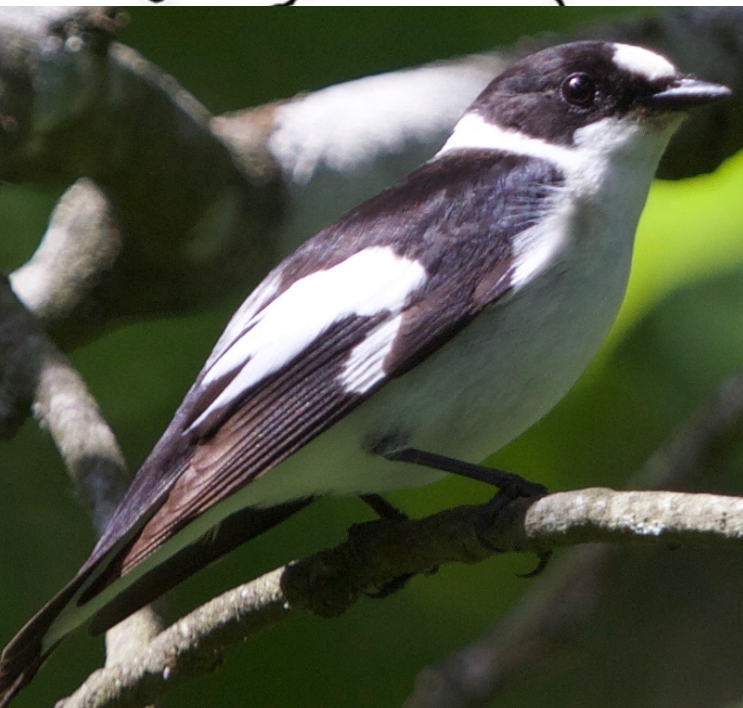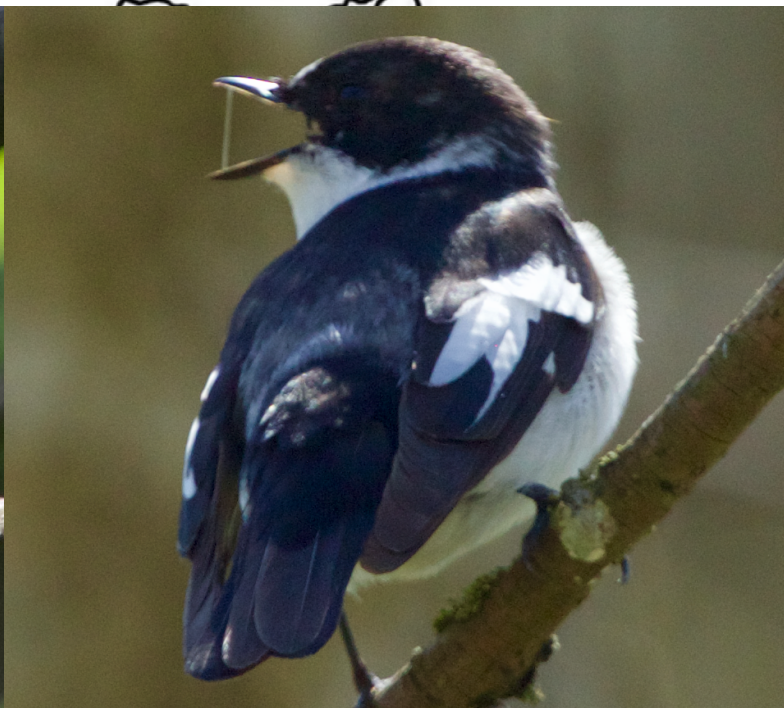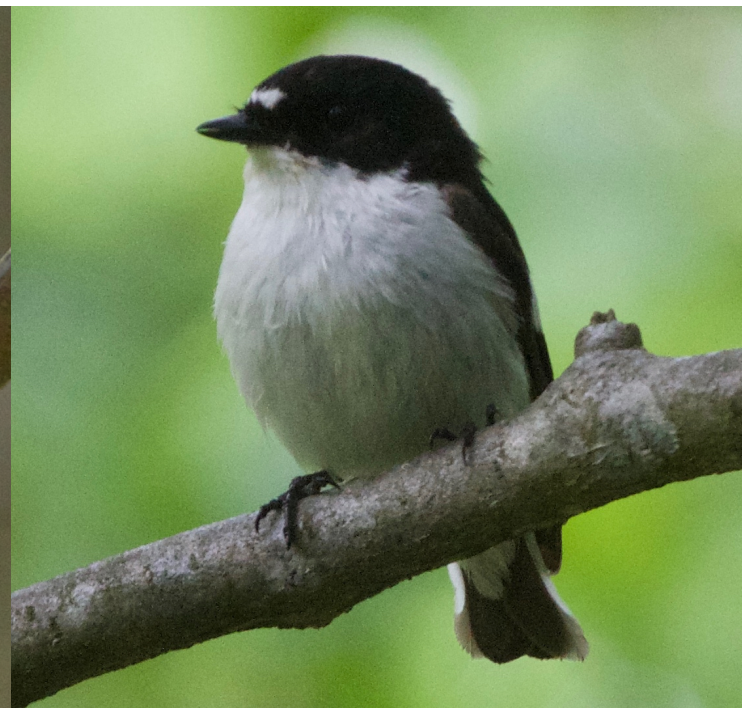

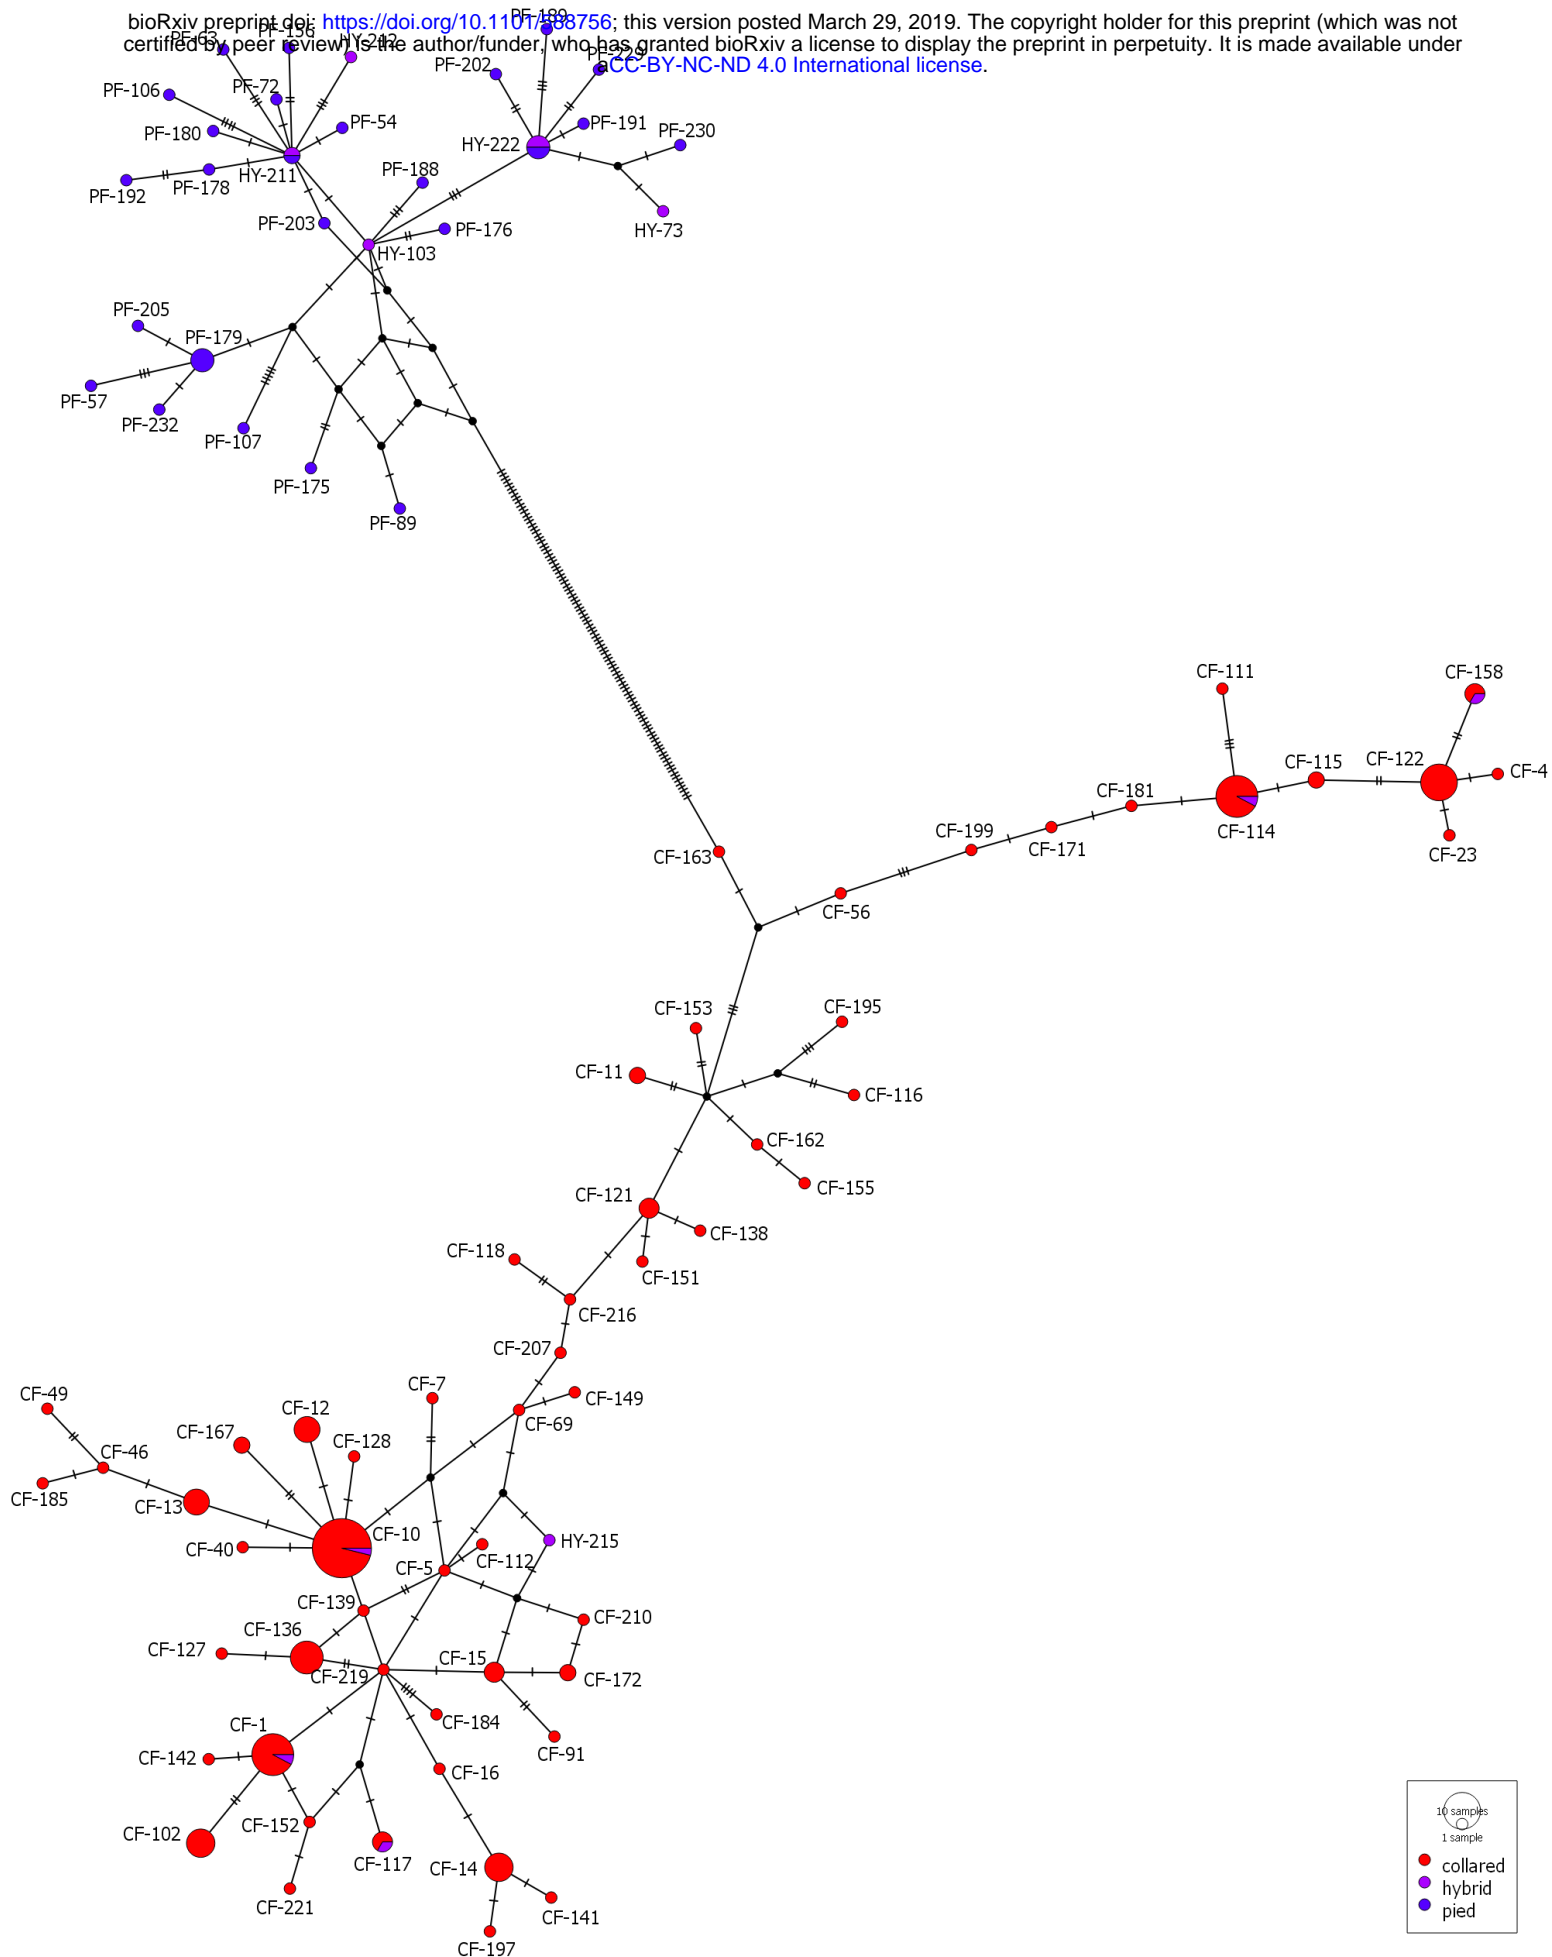



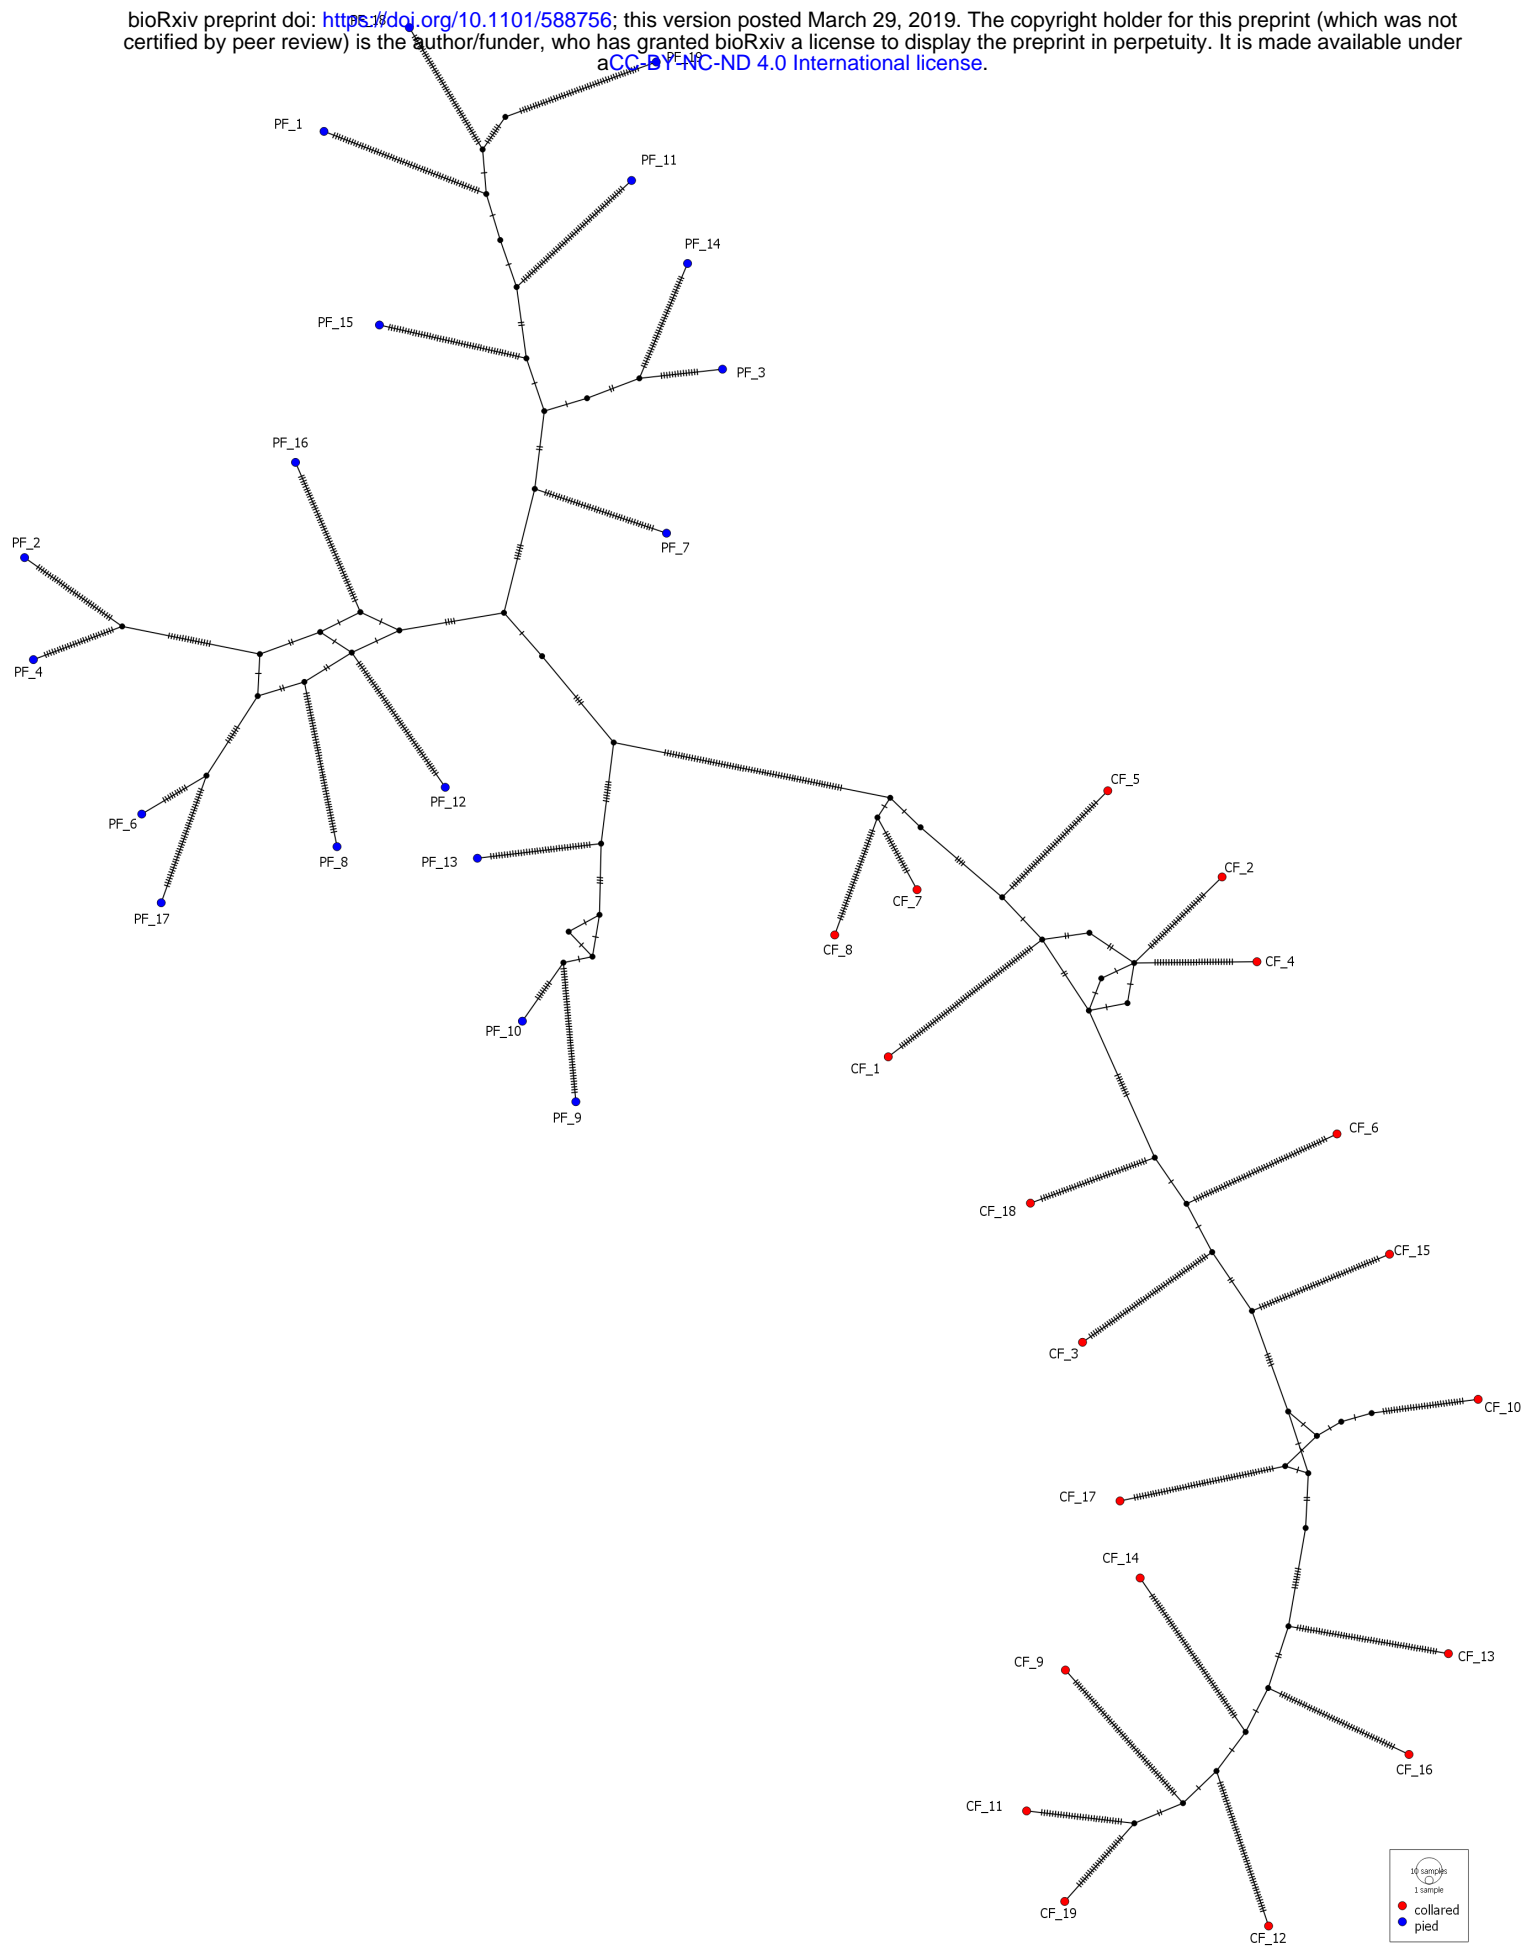

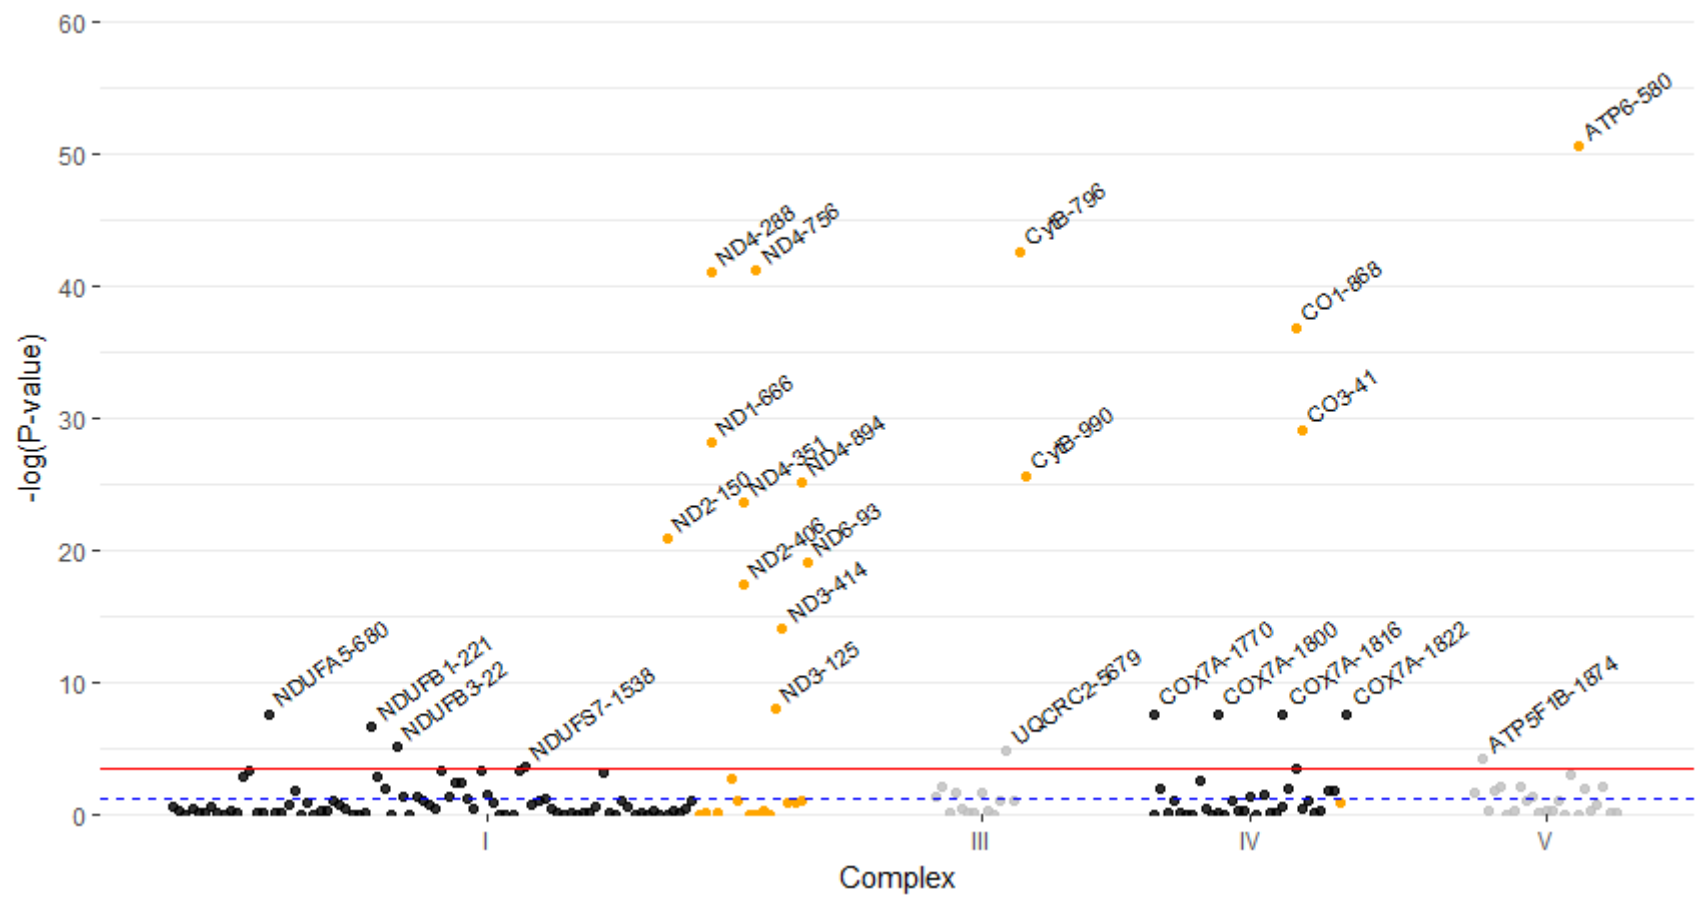

Source: https://www.biorxiv.org/content/10.1101/588756v2.full.pdf
